# Supplementary material for: Structural constraints in current stomatal conductance models preclude accurate estimation of evapotranspiration and its partitions
Source: Research Square preprint supplement (doi:10.21203/rs.3.rs-2694012/v1), 2023-03-28
Supplement: Supplementary file 1 [file d9d85dae8a34093aa6f41beb.docx]

**Supplementary Information**

Table of Contents

[Supplementary Table 1](#Table_S1)............................................................................................................3-5

[Supplementary Table 2](#Table_S2)............................................................................................................6

[Supplementary Figure 1](#Fig_S1)............................................................................................................7

[Supplementary Figure 2](#Fig_S2)............................................................................................................8

[Supplementary Figure 3](#Fig_S3)............................................................................................................9

[Supplementary Figure 4](#Fig_S4)............................................................................................................10

[Supplementary Figure 5](#Fig_S5)............................................................................................................11

[Supplementary Figure 6](#Fig_S6)............................................................................................................12

[Supplementary Figure 7](#Fig_S7)............................................................................................................13

[Supplementary Figure 8](#Fig_S8)............................................................................................................13

[Supplementary Figure 9](#Fig_S9)............................................................................................................14

[Supplementary Figure 10](#Fig_S10)..........................................................................................................15

[Supplementary Figure 11](#Fig_S11)..........................................................................................................16

[Supplementary Figure 12](#Fig_S12)..........................................................................................................17

[Supplementary Figure 13](#Fig_S13)..........................................................................................................18

[Supplementary Figure 14](#Fig_S14)..........................................................................................................19

[Supplementary Figure 15](#Fig_S15)..........................................................................................................20

[Supplementary Figure 16](#Fig_S16)..........................................................................................................21

[Supplementary Figure 17](#Fig_S17)..........................................................................................................22

[Supplementary Figure 18](#Fig_S18)..........................................................................................................23

[Supplementary Figure 19](#Fig_S19)..........................................................................................................24

[Supplementary Figure 20](#Fig_S20)..........................................................................................................25

[Supplementary Figure 21](#Fig_S21)..........................................................................................................26

[Supplementary Figure 22](#Fig_S22)..........................................................................................................27

[Supplementary Figure 23](#Fig_S23)..........................................................................................................28

[Supplementary Figure 24](#Fig_S24)..........................................................................................................29

[Supplementary Figure 25](#Fig_S25)..........................................................................................................30

[Supplementary Figure 26](#Fig_S26)..........................................................................................................31

[Supplementary Figure 27](#Fig_S27)..........................................................................................................32

[Supplementary Figure 28](#Fig_S28)..........................................................................................................33

[Supplementary Figure 29](#Fig_S29)..........................................................................................................34

[Supplementary Figure 30](#Fig_S30)..........................................................................................................35

[Supplementary Figure 31](#Fig_S31)..........................................................................................................36

[Supplementary Figure 32](#Fig_S32)..........................................................................................................37

[Supplementary Figure 33](#Fig_S33)..........................................................................................................38

[Supplementary Figure 34](#Fig_S34)..........................................................................................................39

[Supplementary Figure 35](#Fig_S35)..........................................................................................................39

**Table S1**: Details of Eddy Covariance (EC) sites used in this study. Color coding of the sites is based on the dominant landcover class.

| **Site** | **Long** | **Lat** | **Zm (m)** | **Mean canopy height (m)** | **Time period** | **Data release** | **Dominant Landcover** |
| --- | --- | --- | --- | --- | --- | --- | --- |
| AR-SLu | -66.459801 | -33.464802 | 11 | 4.5 | 2010 | FLUXNET2015 | MF |
| AT-Neu | 11.3175001 | 47.1166687 | 3 | 1 | 2002-2012 | FLUXNET2015 | GRA |
| AU-ASM | 133.248993 | -22.283001 | 11.6 | 6.5 | 2011-2017 | OzFlux | ENF |
| AU-Cpr | 140.589127 | -34.00206 | 20 | 4 | 2011-2017 | OzFlux | SAV |
| AU-Cum | 150.722473 | -33.613297 | 30 | 23 | 2013-2018 | OzFlux | ENF |
| AU-DaP | 131.3181 | -14.0633 | 15 | 0.30 | 2011-2017 | OzFlux | GRA |
| AU-DaS | 131.388001 | -14.159283 | 21 | 16.4 | 2010-2017 | OzFlux | SAV |
| AU-Dry | 132.370606 | -15.2588 | 15 | 12.3 | 2011-2015 | OzFlux | SAV |
| AU-Emr | 148.474594 | -23.8587 | 5.6 | 2 | 2012-2013 | OzFlux | GRA |
| AU-Gin | 120.654099 | -30.191299 | 35 | 18 | 2012-2017 | OzFlux | SAV |
| AU-GWW | 115.650002 | -31.375 | 15 | 7 | 2013-2017 | OzFlux | WSA |
| AU-How | 131.149994 | -12.4952 | 23 | 16 | 2003-2017 | OzFlux | WSA |
| AU-Rig | 145.575897 | -36.649899 | 2.5 | 0.4 | 2011-2016 | OzFlux | GRA |
| AU-Stp | 133.350205 | -17.1507 | 4.8 | 0.5 | 2010-2017 | OzFlux | GRA |
| AU-TTE | 133.639999 | -22.287001 | 9.8 | 4.85 | 2013-2017 | OzFlux | OSH |
| AU-Tum | 148.151703 | -35.656601 | 70 | 40 | 2002-2017 | OzFlux | EBF |
| AU-Ync | 146.290695 | -34.9893 | 8 | 0.5 | 2011-2017 | OzFlux | GRA |
| BE-Lon | 4.74612999 | 50.55159 | 2.7 | 1 | 2005-2014 | FLUXNET2015 | CRO |
| BE-Vie | 5.99805021 | 50.305069 | 40 | 35 | 1997-2014 | FLUXNET2015 | MF |
| BR-Sa3 | -54.971436 | -3.0180292 | 64 | 40 | 2001-2003 | FLUXNET2015 | EBF |
| CA-NS1 | -98.483902 | 55.8792 | 24 | 20 | 2003 | FLUXNET2015 | ENF |
| CA-NS2 | -98.524696 | 55.9057999 | 20 | 20 | 2002-2004 | FLUXNET2015 | ENF |
| CA-NS4 | -98.3806 | 55.9143982 | 10 | 7 | 2003-2004 | FLUXNET2015 | ENF |
| CA-NS5 | -98.485001 | 55.8630981 | 9 | 5 | 2003-2004 | FLUXNET2015 | ENF |
| CA-NS6 | -98.964401 | 55.9166985 | 6 | 4 | 2002-2004 | FLUXNET2015 | OSH |
| CA-NS7 | -99.948303 | 56.6357994 | 6 | 0.25 | 2003-2004 | FLUXNET2015 | OSH |
| CA-Qfo | -74.342102 | 49.6925011 | 24 | 14 | 2004-2010 | FLUXNET2015 | ENF |
| CA-SF1 | -105.8176 | 54.4850006 | 12 | 6 | 2004-2006 | FLUXNET2015 | ENF |
| CA-SF2 | -105.8775 | 54.2538986 | 10 | 4 | 2003-2005 | FLUXNET2015 | ENF |
| CA-SF3 | -106.0053 | 54.0915985 | 20 | 1 | 2003-2005 | FLUXNET2015 | OSH |
| CH-Cha | 8.41044045 | 47.2102203 | 2 | 0.5 | 2006-2014 | FLUXNET2015 | GRA |
| CH-Dav | 9.85591984 | 46.8153343 | 35 | 25 | 1997-2014 | FLUXNET2015 | ENF |
| CH-Fru | 8.53777981 | 47.1158333 | 2.55 | 0.5 | 2007-2014 | FLUXNET2015 | GRA |
| CH-Oe1 | 7.73193979 | 47.2858315 | 2 | 0.5 | 2002-2008 | FLUXNET2015 | GRA |
| CN-Cha | 128.095795 | 42.4025002 | 40 | 28 | 2003-2005 | FLUXNET2015 | MF |
| CN-Cng | 123.509201 | 44.5933991 | 2 | 0.75 | 2008-2009 | FLUXNET2015 | GRA |
| CN-Dan | 91.0663986 | 30.4978008 | 2.1 | 1 | 2004-2005 | FLUXNET2015 | GRA |
| CN-Din | 112.536102 | 23.1732998 | 32 | 30 | 2003-2005 | FLUXNET2015 | EBF |
| CN-Du2 | 116.2836 | 42.0466995 | 3 | 0.5 | 2007-2008 | FLUXNET2015 | GRA |
| CN-HaM | 101.18 | 37.3699989 | 2.2 | 0.30 | 2002-2003 | FLUXNET2015 | GRA |
| CN-Qia | 115.058098 | 26.7413998 | 39.6 | 13 | 2003-2005 | FLUXNET2015 | ENF |
| DE-Geb | 10.9143 | 51.1001015 | 6 | 1 | 2001-2014 | FLUXNET2015 | CRO |
| DE-Gri | 13.5125303 | 50.9494705 | 3 | 0.7 | 2004-2014 | FLUXNET2015 | GRA |
| DE-Hai | 10.4530001 | 51.0791664 | 43.5 | 33 | 2000-2012 | FLUXNET2015 | DBF |
| DE-Kli | 13.5223799 | 50.8930588 | 3.5 | 1.5 | 2005-2014 | FLUXNET2015 | CRO |
| DE-Obe | 13.7212896 | 50.7866592 | 30 | 19 | 2008-2014 | FLUXNET2015 | ENF |
| DE-Seh | 6.44964981 | 50.8706245 | 2 | 0.80 | 2008-2010 | FLUXNET2015 | CRO |
| DE-Tha | 13.5669403 | 50.9636116 | 42 | 26.5 | 1998-2014 | FLUXNET2015 | ENF |
| ES-LMa | -2.9658301 | 37.0979347 | 1.5 | 0.2 | 2004-2006 | LaThuile | OSH |
| FI-Hyy | 24.2950001 | 61.8474999 | 23 | 14 | 1996-2014 | FLUXNET2015 | ENF |
| FI-Sod | 26.6378307 | 67.3618622 | 23 | 12.7 | 2008-2014 | FLUXNET2015 | ENF |
| FR-Gri | 1.95191002 | 48.8442192 | 3.17 | 1 | 2005-2013 | FLUXNET2015 | CRO |
| FR-LBr | -0.7693 | 44.7171097 | 38 | 20 | 2003-2008 | FLUXNET2015 | ENF |
| GF-Guy | -52.924858 | 5.27877188 | 55 | 35 | 2004-2014 | FLUXNET2015 | EBF |
| IT-BCi | 14.9574404 | 40.5237999 | 2 | 1 | 2005-2010 | FLUXNET2015 | CRO |
| IT -CA1 | 12.0265598 | 42.3804092 | 8 | 5.5 | 2012-2013 | FLUXNET2015 | DBF |
| IT-CA2 | 12.0260401 | 42.3772202 | 3.2 | 0.3 | 2012-2013 | FLUXNET2015 | CRO |
| IT-CA3 | 12.0221996 | 42.3800011 | 7 | 3.5 | 2012-2013 | FLUXNET2015 | DBF |
| IT-Col | 13.5881395 | 41.8493614 | 25.2 | 13 | 2007-2014 | FLUXNET2015 | DBF |
| IT-Cpz | 12.3761101 | 41.7052498 | 15 | 13 | 2001-2008 | FLUXNET2015 | EBF |
| IT-Isp | 8.63358021 | 45.8126411 | 38 | 19 | 2013-2014 | FLUXNET2015 | DBF |
| IT-LMa | 11.2813196 | 45.9561997 | 33 | 28 | 2003-2004 | LaThuile | ENF |
| IT-Mal | 11.0458298 | 46.014679 | 2.5 | 0.3 | 2003 | LaThuile | GRA |
| IT-Noe | 8.15168953 | 40.6061783 | 3 | 1.2 | 2004-2014 | FLUXNET2015 | CSH |
| IT-PT1 | 9.06103993 | 45.2008705 | 30 | 26 | 2003-2004 | FLUXNET2015 | DBF |
| IT-Ren | 11.4336901 | 46.5868607 | 40 | 28 | 2010-2013 | FLUXNET2015 | ENF |
| IT-Ro1 | 11.9300098 | 42.4081192 | 20 | 15 | 2002-2006 | FLUXNET2015 | DBF |
| IT-Ro2 | 11.9209299 | 42.3902588 | 20 | 15 | 2002-2008 | FLUXNET2015 | DBF |
| IT-SR2 | 10.2909098 | 43.732029 | 23.5 | 19 | 2013-2014 | FLUXNET2015 | ENF |
| IT-SRo | 10.28444 | 43.7278595 | 23.5 | 16 | 2003-2012 | FLUXNET2015 | ENF |
| NL-Loo | 5.74355984 | 52.1665802 | 27 | 15.5 | 1997-2013 | FLUXNET2015 | ENF |
| RU-Fyo | 32.922081 | 56.4615288 | 48 | 21 | 2003-2014 | FLUXNET2015 | ENF |
| SD-Dem | 30.4783001 | 13.2828999 | 2.5 | 1.5 | 2005-2009 | FLUXNET2015 | SAV |
| US-AR1 | -99.419998 | 36.4267006 | 2.84 | 1 | 2010-2012 | FLUXNET2015 | GRA |
| US-AR2 | -99.597504 | 36.6357994 | 2.95 | 1 | 2010-2011 | FLUXNET2015 | GRA |
| US-ARM | -97.4888 | 36.6058006 | 60 | 0.5 | 2003-2012 | FLUXNET2015 | CRO |
| US-Blo | -120.63275 | 38.8953018 | 12.5 | 4.7 | 2000-2006 | FLUXNET2015 | ENF |
| US-Cop | -109.39 | 38.0900002 | 1.85 | 0.5 | 2002-2003 | FLUXNET2015 | GRA |
| US-GLE | -106.2399 | 41.3665009 | 23 | 10 | 2009-2014 | FLUXNET2015 | ENF |
| US-Goo | -89.873497 | 34.2546997 | 4 | 0.3 | 2004-2006 | LaThuile | GRA |
| US-KS2 | -80.671532 | 28.6085777 | 3.5 | 2 | 2003-2006 | FLUXNET2015 | CSH |
| US-Me2 | -121.5574 | 44.452301 | 29 | 16 | 2002-2014 | FLUXNET2015 | ENF |
| US-Me4 | -121.6224 | 44.4991989 | 47 | 20 | 1996-2000 | LaThuile | ENF |
| US-Me6 | -121.6078 | 44.3232994 | 14 | 5.2 | 2011-2014 | FLUXNET2015 | ENF |
| US-MMS | -86.413101 | 39.3232002 | 48 | 27 | 1999-2014 | FLUXNET2015 | DBF |
| US-Ne1 | -105.5464 | 40.0329018 | 26 | 12 | 2002-2012 | FLUXNET2015 | ENF |
| US-Ne2 | -96.476601 | 41.1651001 | 6 | 3 | 2002-2012 | FLUXNET2015 | CRO |
| US-Ne3 | -96.4701 | 41.1649017 | 6 | 2.5 | 2002-2012 | FLUXNET2015 | CRO |
| US-NR1 | -96.439697 | 41.1796989 | 6 | 2.5 | 1999-2014 | FLUXNET2015 | CRO |
| US-Prr | -147.48759 | 65.123703 | 16 | 7 | 2011-2013 | FLUXNET2015 | ENF |
| US-SRG | -110.8277 | 31.7894001 | 3.25 | 1 | 2009-2014 | FLUXNET2015 | GRA |
| US-SRM | -110.866 | 31.8213997 | 6.4 | 2.5 | 2004-2014 | FLUXNET2015 | WSA |
| US-Syv | -89.347702 | 46.2420006 | 36 | 27 | 2002-2008 | FLUXNET2015 | MF |
| US-Ton | -120.966 | 38.4315987 | 23 | 7.1 | 2001-2014 | FLUXNET2015 | WSA |
| US-UMB | -84.713799 | 45.5597992 | 50 | 20 | 2000-2014 | FLUXNET2015 | DBF |
| US-Var | -120.95076 | 38.4132996 | 3 | 0.55 | 2001-2014 | FLUXNET2015 | GRA |
| US-WCr | -90.079903 | 45.8059006 | 30 | 24 | 1999-2006 | FLUXNET2015 | DBF |
| US-Whs | -110.0522 | 31.7437992 | 4 | 0.5 | 2008-2014 | FLUXNET2015 | OSH |
| US-Wkg | -109.9419 | 31.7364998 | 6.4 | 1 | 2005-2014 | FLUXNET2015 | GRA |
| ZA-Kru | 31.4969006 | -25.019699 | 16 | 12 | 2000-2002 | FLUXNET2015 | SAV |
| ZM-Mon | 23.2527809 | -15.437778 | 33 | 12 | 2008 | FLUXNET2015 | DBF |

**Table S2**: The variables used for training ANN for the estimation of stomatal conductance () in pure ML approach.

| **Number** | **Variables** | **Full Name** | **Units** | **Data source** | **Frequency** |
| --- | --- | --- | --- | --- | --- |
| 1 | Ta | Air temperature | ℃ | PLUMBER21 | 30 minutes / 1 hour |
| 2 | SRad | Incoming Shortwave Radiation |  | PLUMBER2 | 30 minutes / 1 hour |
| 3 | fPAR | Fraction of photosynthetically active radiation | - | MCD15A3H (<https://modis.ornl.gov/cgi-bin/MODIS/global/subset.pl>) | 4 days |
| 4 | USTAR | Friction velocity |  | PLUMBER2 | 30 minutes / 1 hour |
| 5 | VPD | Vapor pressure deficit |  | PLUMBER2 | 30 minutes / 1 hour |
| 6 | WS | Wind speed |  | PLUMBER2 | 30 minutes / 1 hour |
| 7 | Ca | Atmospheric concentration |  | PLUMBER2 | 30 minutes / 1 hour |
| 8 | LAI | Leaf area index |  | MCD15A2H.006 (available from MODISTools R package) | 8 days (interpolated to the time resolution of the flux tower data) |
| 9 | SM | Soil water content |  | PLUMBER2 | 30 minutes / 1 hour |
| 10 | Rn | Net radiation |  | PLUMBER2 | 30 minutes / 1 hour |
| 11 | G | Soil heat flux |  | PLUMBER2 | 30 minutes / 1 hour |
| 12 | LE | Latent heat flux |  | PLUMBER2 | 30 minutes / 1 hour |
| 13 | T | Plant transpiration |  | Obtained from different ET partitioning methods (see Methods in the main manuscript) | 30 minutes / 1 hour |

Note: Variables 1-11 were used as input variables and variables 12-13 were used as target variables.

| 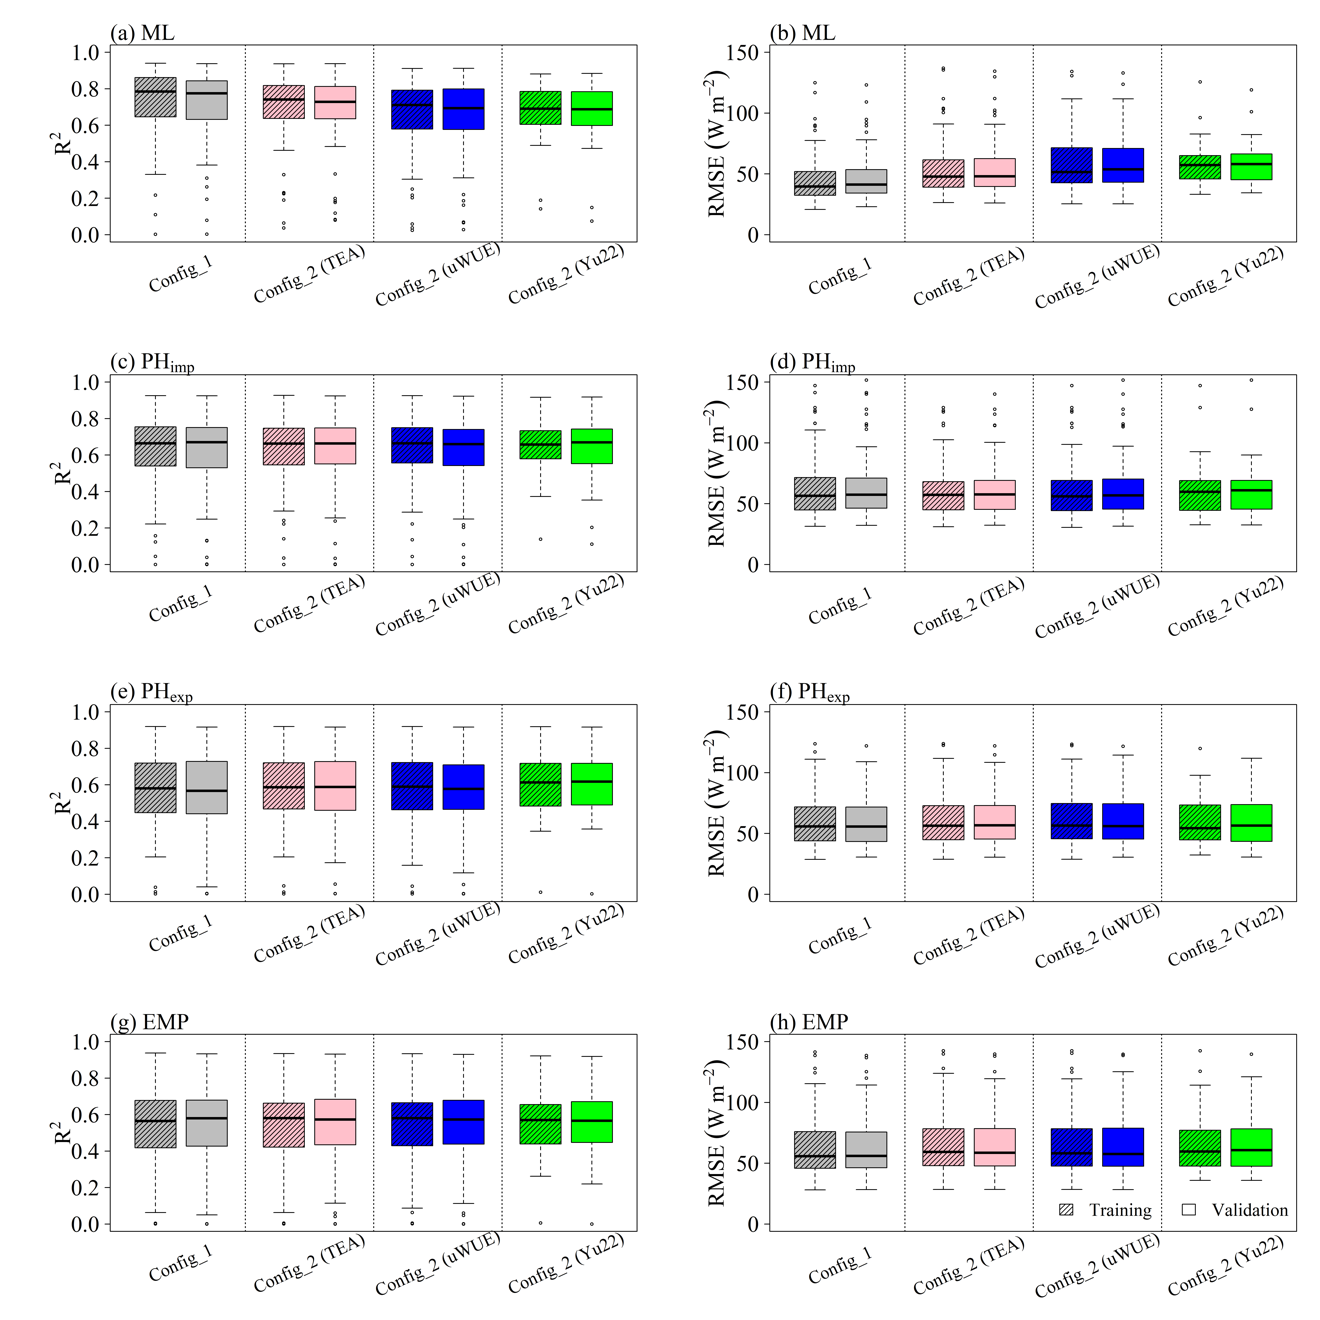 |
| --- |
| Fig. S1. Performance of different models (i.e., ML (machine learning), PHimp (implicit representation of plant hydraulics), PHexp (explicit representation of plant hydraulics), and EMP (empirical)) for the prediction of evapotranspiration (ET) during training (textured boxes) and validation (plain boxes) of the models across the eddy covariance flux sites. Config_1 and Config_2 correspond to Configuration-1 and Configuration-2, respectively. |

| 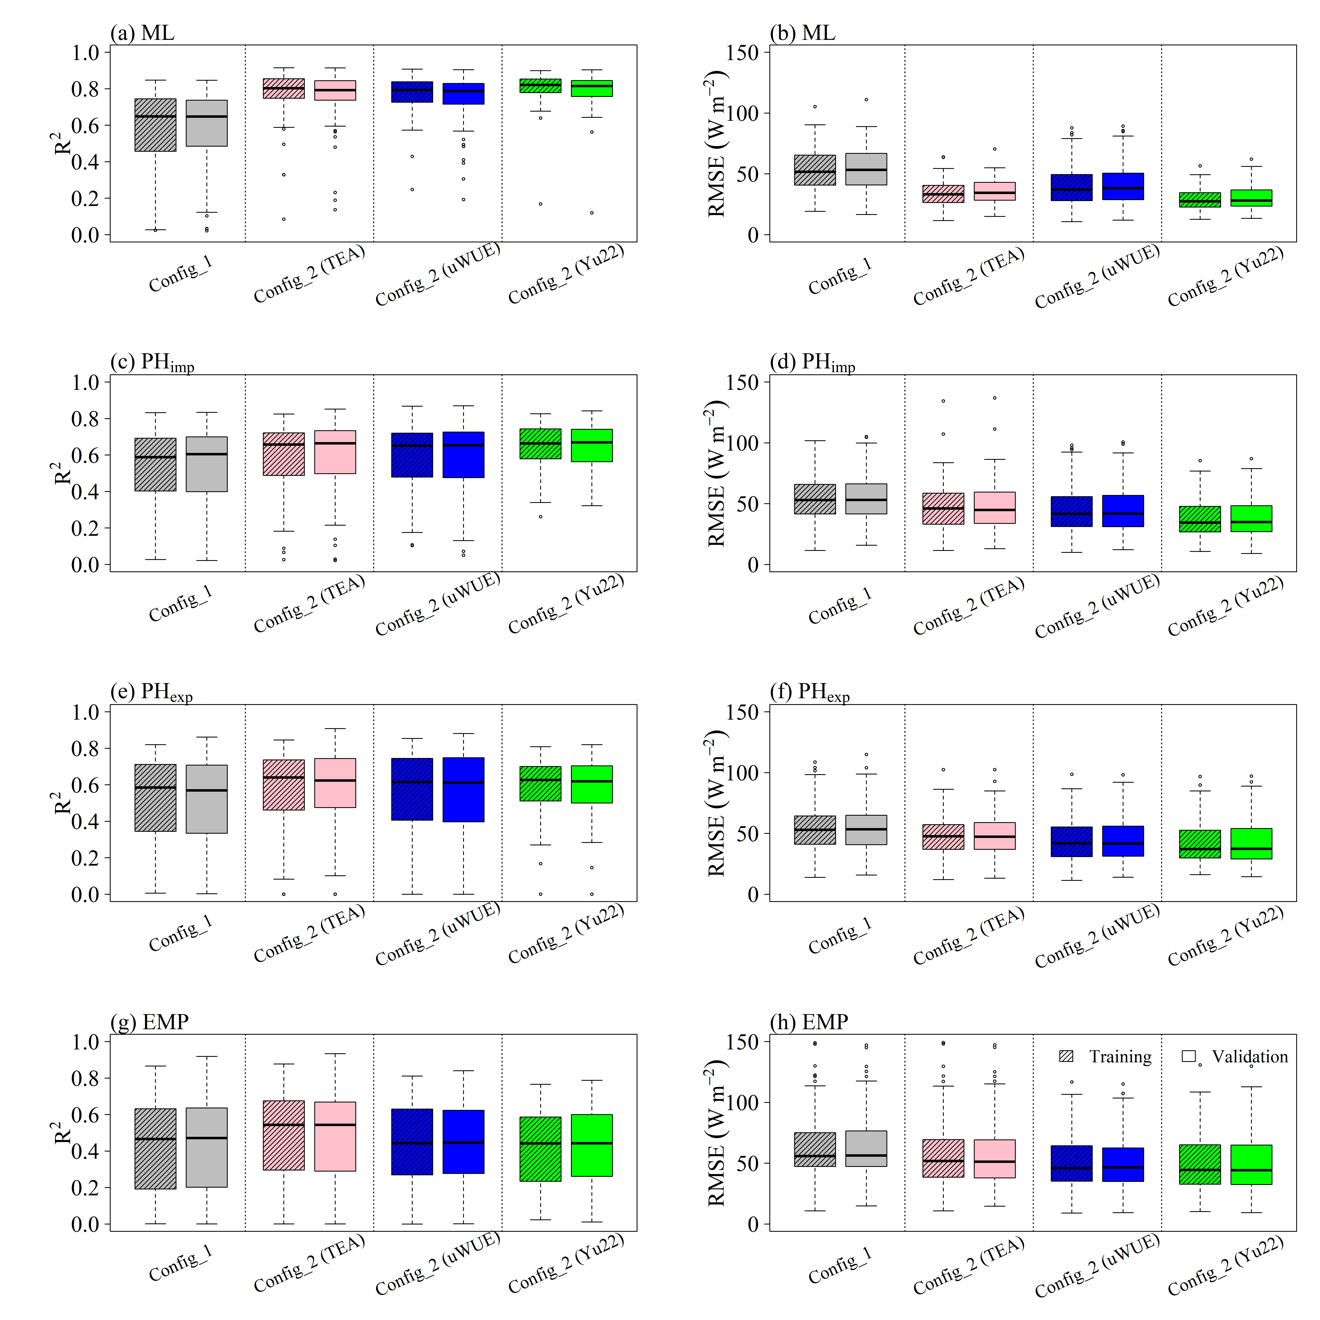 |
| --- |
| Fig. S2. Performance of different models (i.e., ML (machine learning), PHimp (implicit representation of plant hydraulics), PHexp (explicit representation of plant hydraulics), and EMP (empirical)) for the prediction of plant transpiration (T) during training (textured boxes) and validation (plain boxes) of the models across the eddy covariance flux sites. Config_1 and Config_2 correspond to Configuration-1 and Configuration-2, respectively. |

| 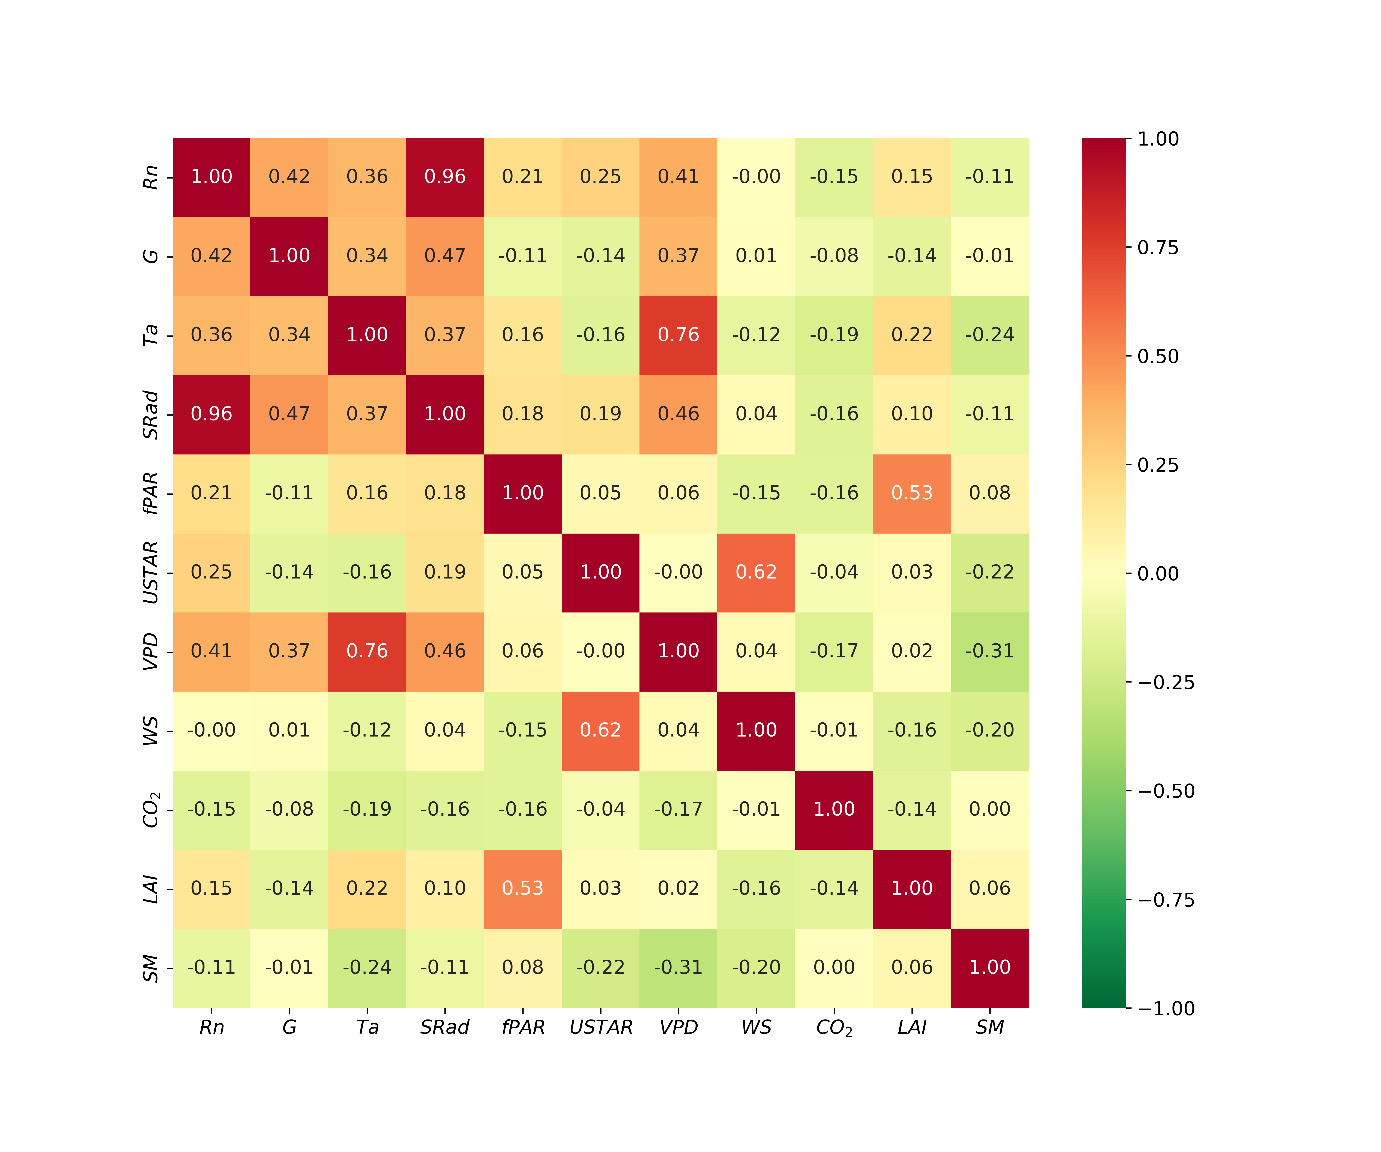 |
| --- |
| Fig. S3. Correlation matrix of different input variables used to model stomatal conductance () in the machine learning (ML) model. |

| 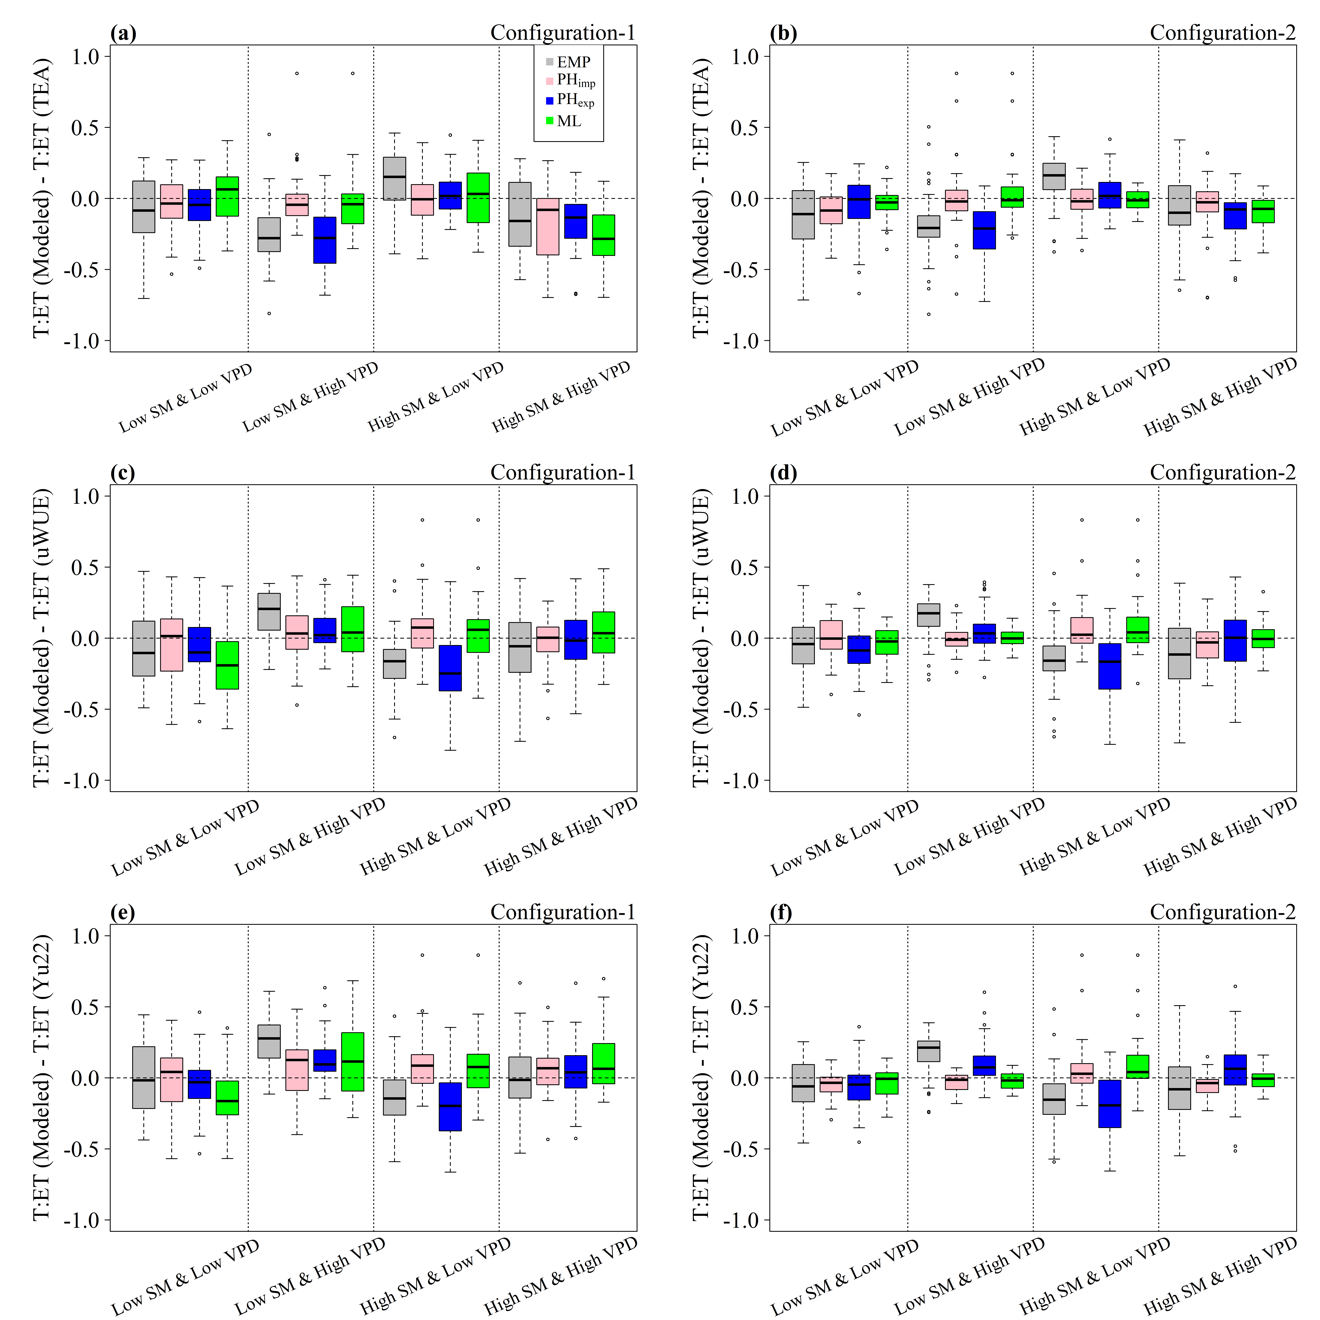 |
| --- |
| Fig. S4. Error statistics of different models (i.e., ML (machine learning), PHimp (implicit representation of plant hydraulics), PHexp (explicit representation of plant hydraulics), and EMP (empirical)) for ET partitioning under different regimes of soil moisture (SM) and VPD at all the sites. Y-axis in each panel shows the mean difference between the T:ET obtained from either of the three models and mean T:ET from either of the three ET partitioning methods. The difference evaluations shown in the right column are between modeled estimated T:ET and that from the ET partitioning method whose T is used to train the model in Configuration-2. High and Low designation of SM and VPD is based on 25 and 75 percentile values, respectively, for each site. |

| 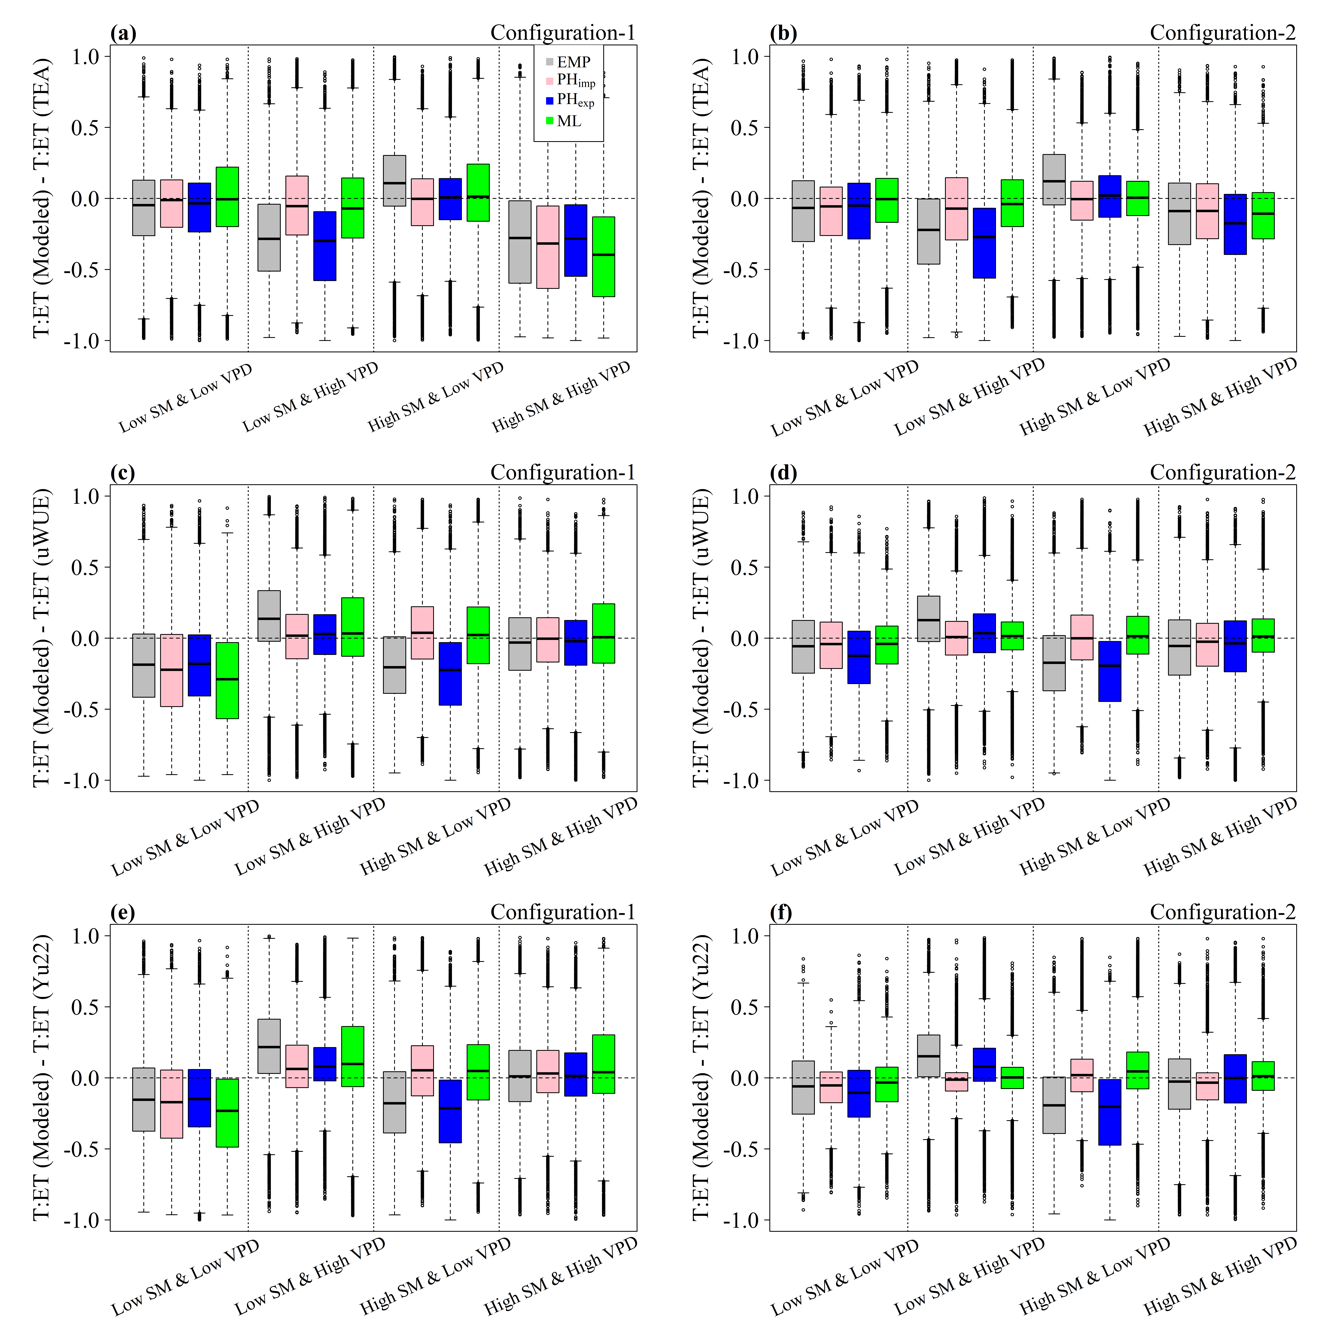 |
| --- |
| Fig. S5. Error statistics of different models (i.e., ML (machine learning), PHimp (implicit representation of plant hydraulics), PHexp (explicit representation of plant hydraulics), and EMP (empirical)) for ET partitioning under different regimes of soil moisture (SM) and VPD at all the sites. Y-axis in each panel shows the difference between the T:ET obtained from either of the three models and T:ET from either of the three ET partitioning methods across all the sites. The difference evaluations shown in the right column are between modeled estimated T:ET and that from the ET partitioning method whose T is used to train the model in Configuration-2. Definition of high and low SM or VPD is noted in the caption of Fig. S4. |

| 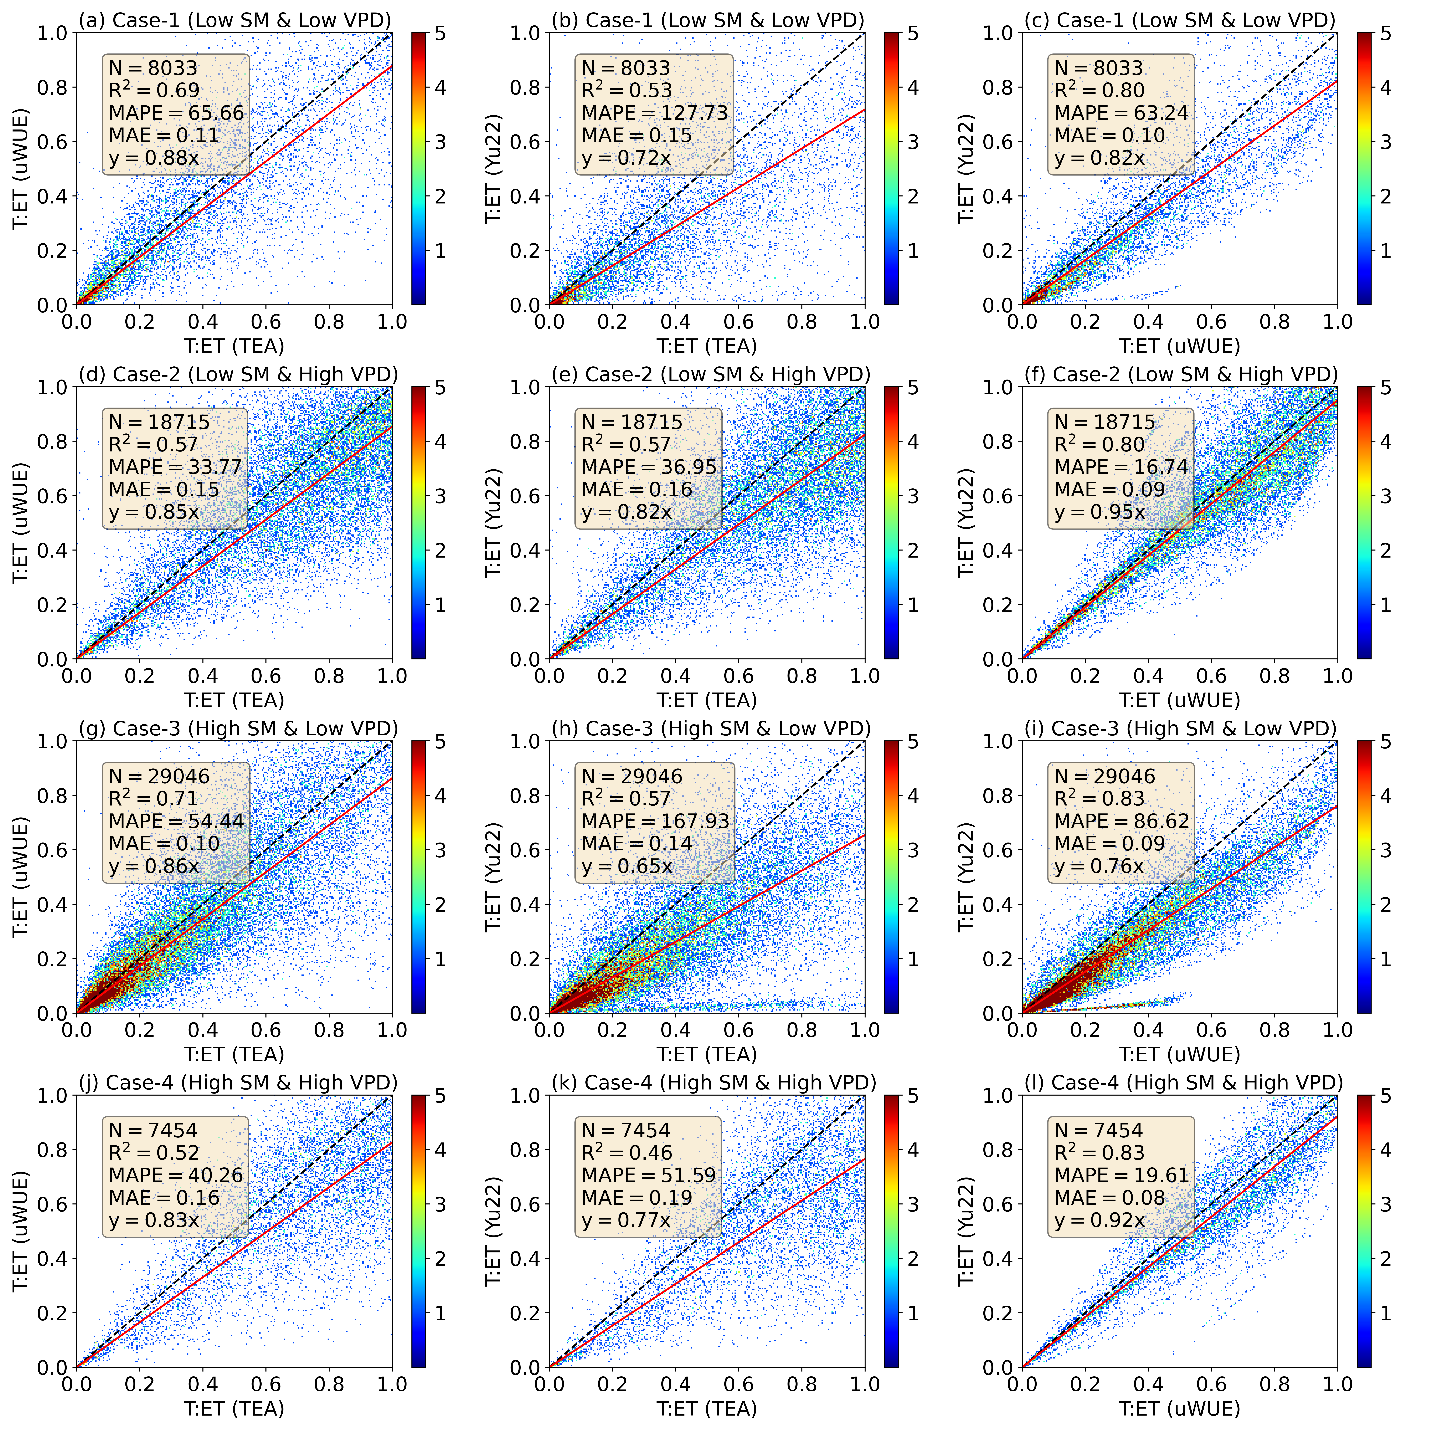 |
| --- |
| Fig. S6. Comparison of T:ET from different ET partitioning methods (TEA, uWUE, and Yu22) under different regimes of soil moisture (SM) and vapor pressure deficit (VPD). Definition of high and low SM or VPD is noted in the caption of Fig. S4. |

| 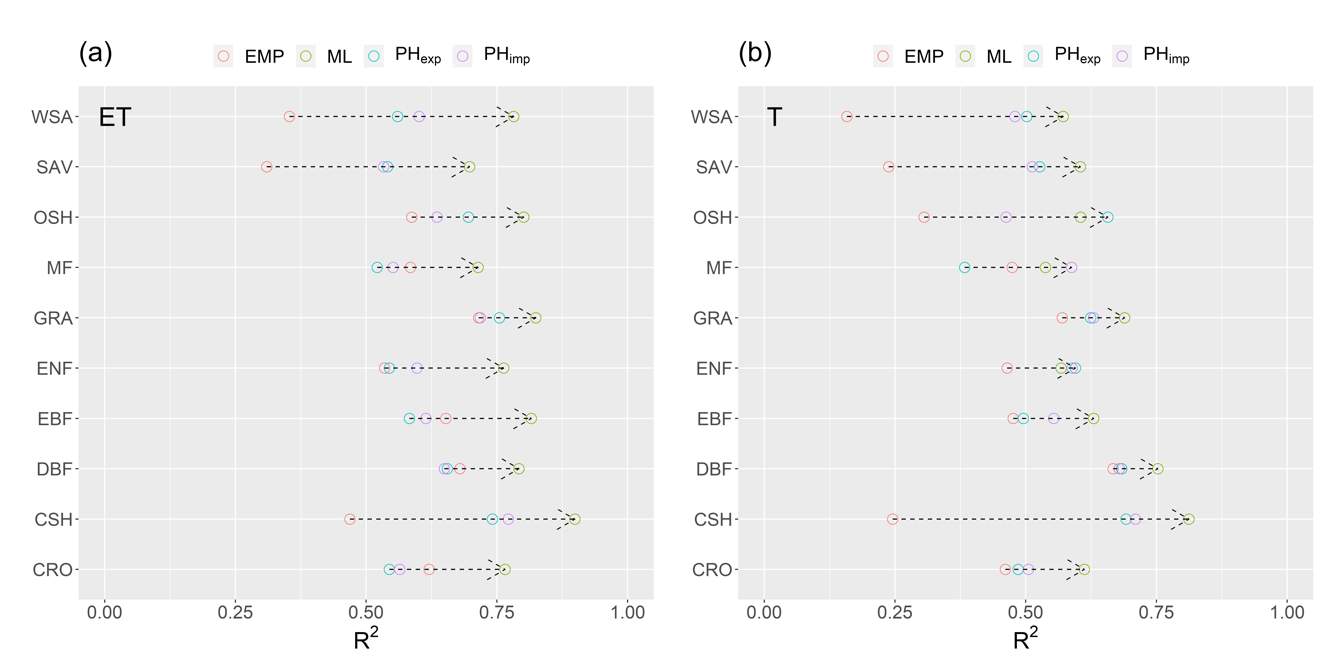 |
| --- |
| Fig. S7. Performance of different models (i.e., ML (machine learning), PHimp (implicit representation of plant hydraulics), PHexp (explicit representation of plant hydraulics), and EMP (empirical)) for the prediction of evapotranspiration (ET) and plant transpiration (T) under different biomes for Configuration-1. Abbreviations of the land covers can be referred in Fig. 1 of the main document. |

| 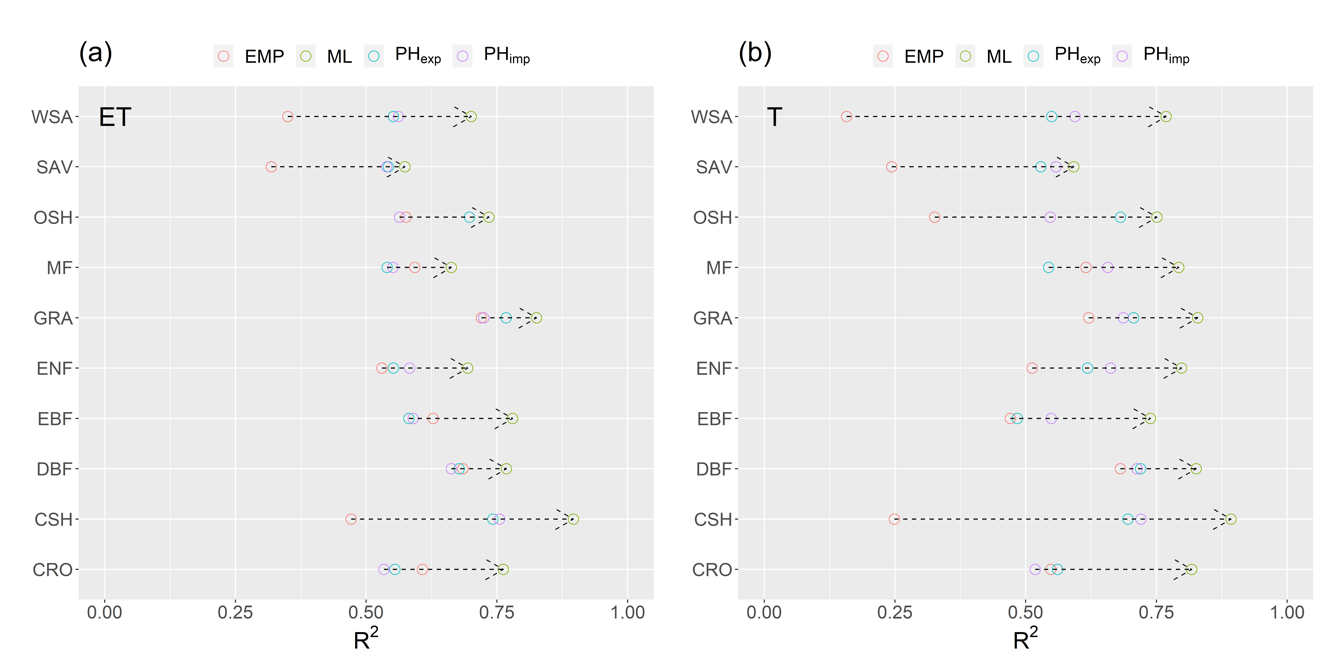 |
| --- |
| Fig. S8. Performance of different models (i.e., ML (machine learning), PHimp (implicit representation of plant hydraulics), PHexp (explicit representation of plant hydraulics), and EMP (empirical)) for the prediction of evapotranspiration (ET) and plant transpiration (T) under different biomes for Configuration-2 (TEA). Abbreviations of the land covers can be referred in Fig. 1 of the main document. |





Fig. S9. Performance of the machine learning (ML) model for predicting latent heat flux (LE) in different biomes for Configuration-1. The diagonal black dashed line is a 1:1 line, and the red solid line is the nonbiased linear regression line. The shaded colors represent the density of scatter points. N, , MAPE, MAE, and RMSE are the total number of scatter points in each panel, coefficient of determination, mean absolute percentage error, mean absolute error, and root-mean-square-error, respectively.

Fig. S10. Energy conservation in the machine learning (ML) model outputs in different biomes for Configuration-1. The diagonal black dashed line is a 1:1 line, and the red solid line is the nonbiased linear regression line. The shaded colors represent the density of scatter points. N, , MAPE, MAE, and RMSE are the total number of scatter points in each panel, coefficient of determination, mean absolute percentage error, mean absolute error, and root-mean-square-error, respectively.





Fig. S11. Performance of the implicit plant hydraulics (PHimp) model for predicting latent heat flux (LE) in different biomes for Configuration-1. The diagonal black dashed line is a 1:1 line, and the red solid line is the nonbiased linear regression line. The shaded colors represent the density of scatter points. N, , MAPE, MAE, and RMSE are the total number of scatter points in each panel, coefficient of determination, mean absolute percentage error, mean absolute error, and root-mean-square-error, respectively.


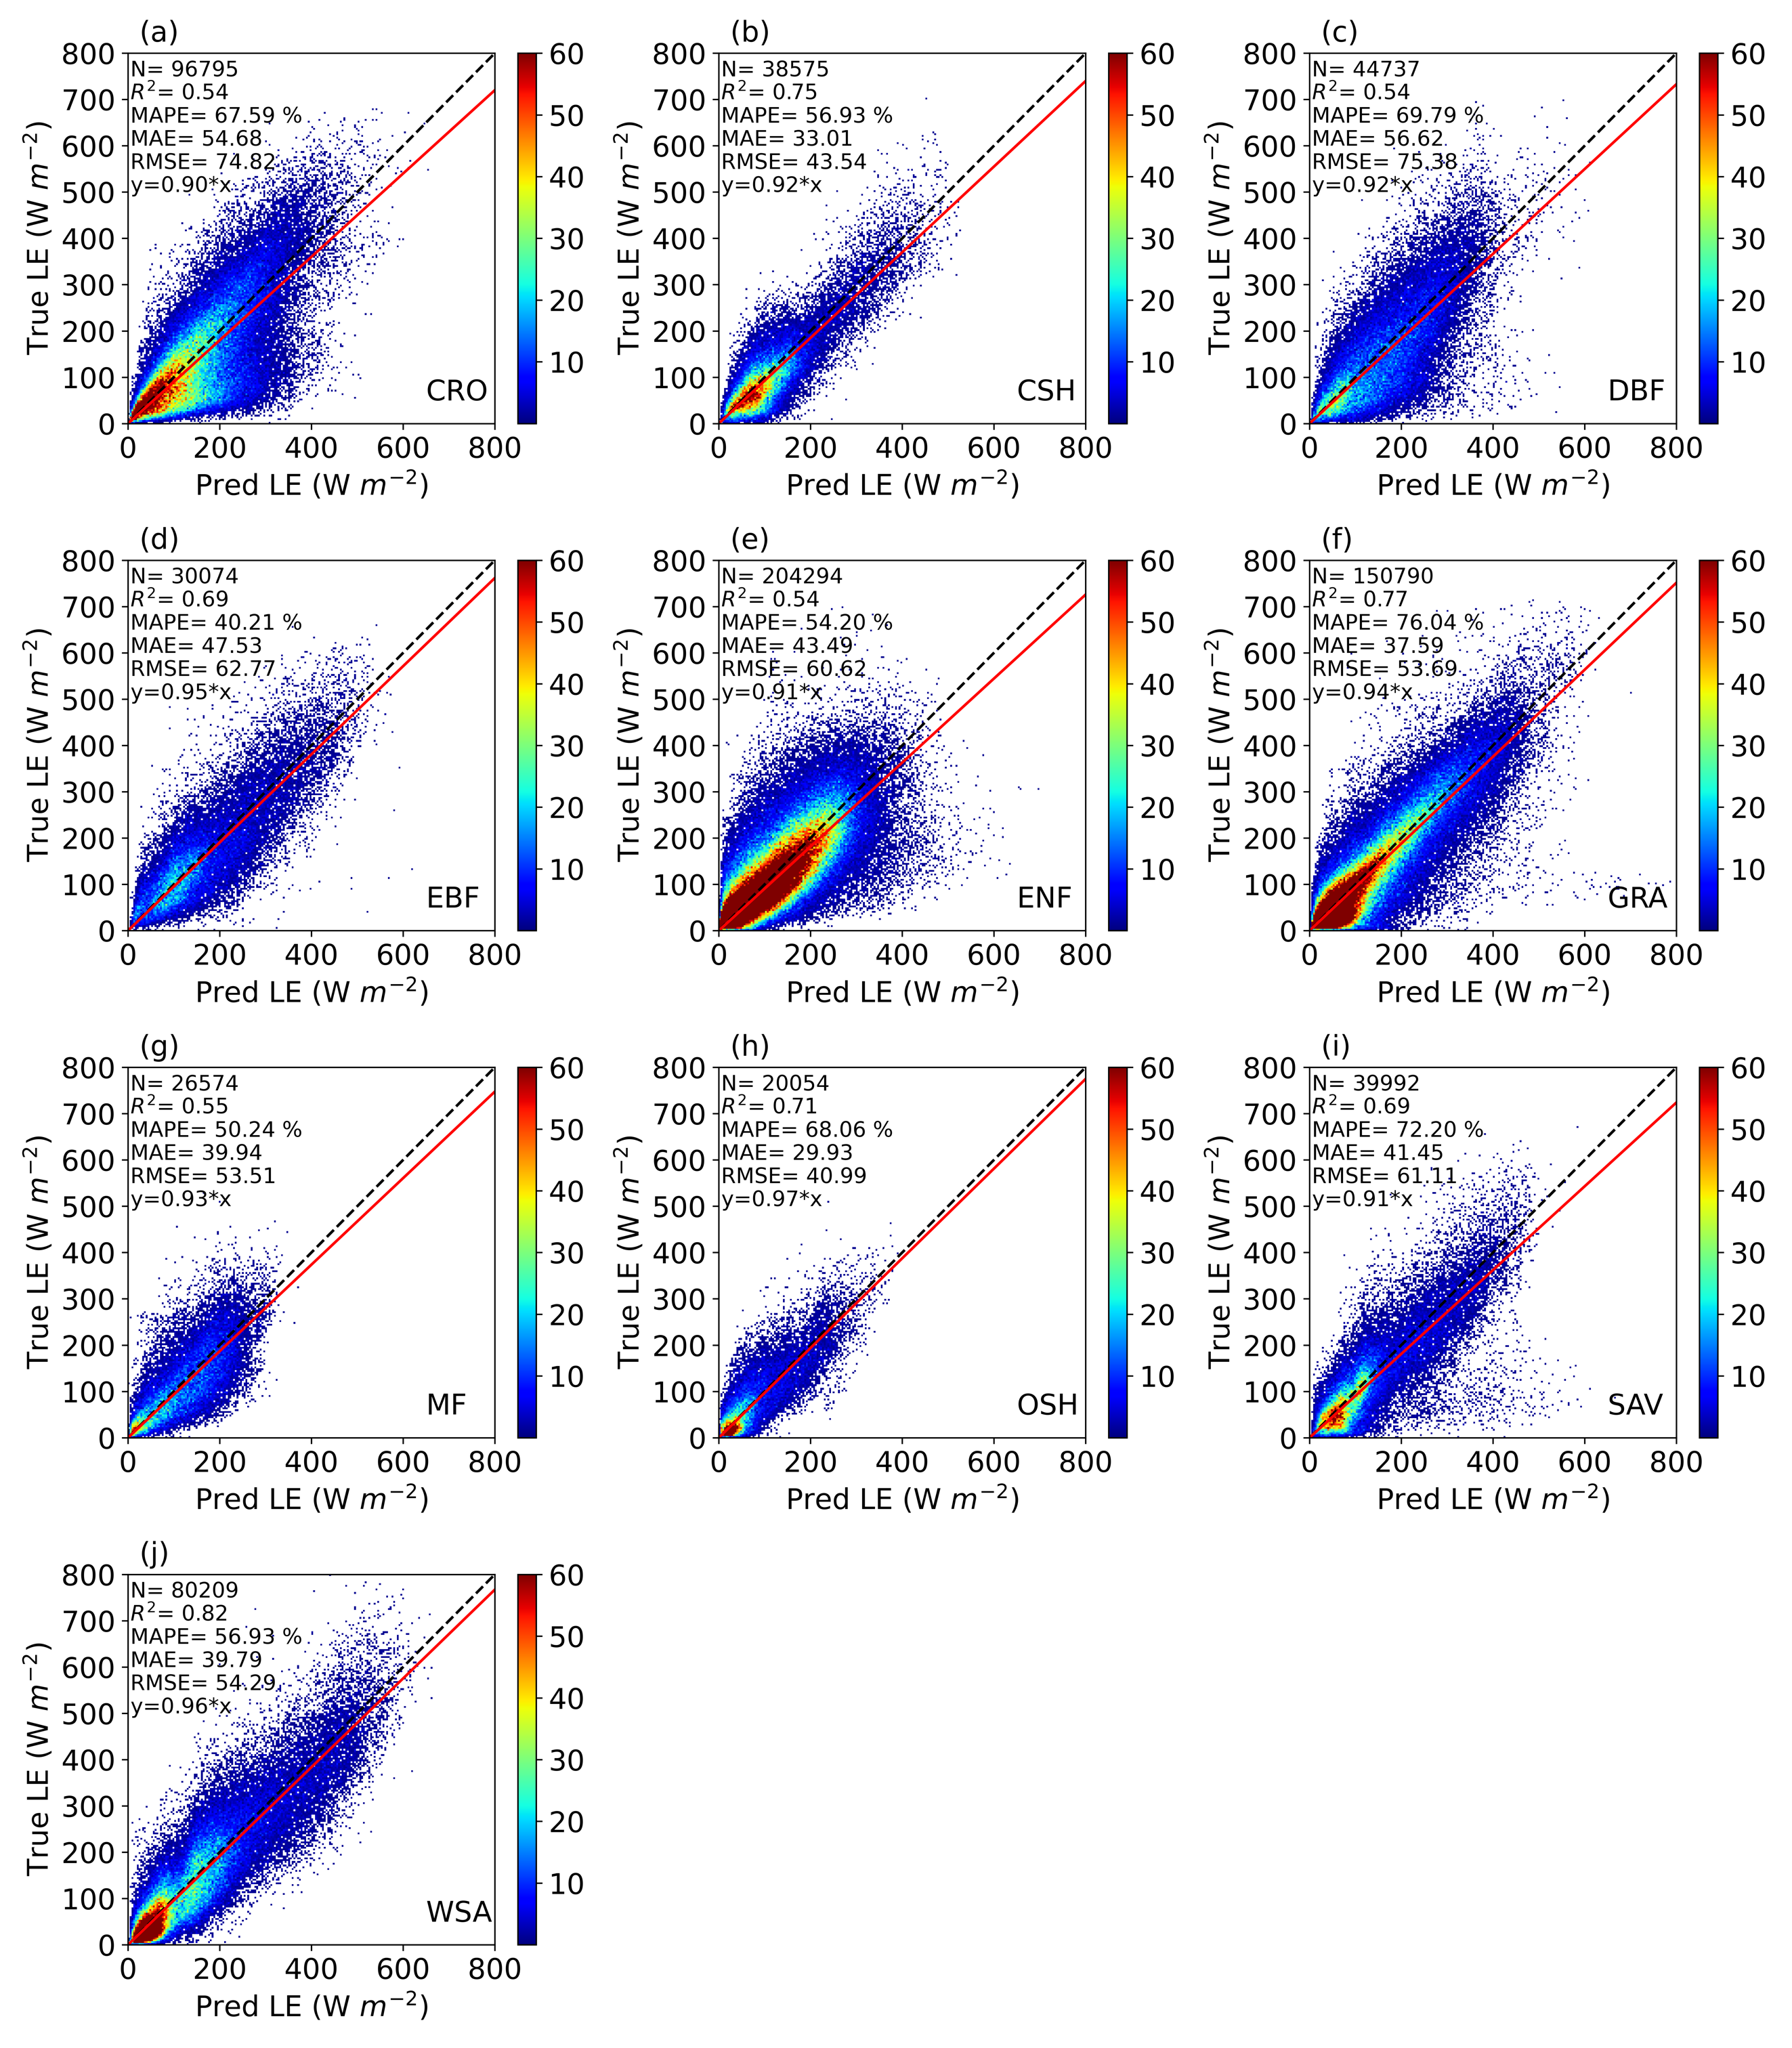


Fig. S12. Energy conservation in PHimp model outputs in different biomes for Configuration-1. The diagonal black dashed line is a 1:1 line, and the red solid line is the nonbiased linear regression line. The shaded colors represent the density of scatter points. N, , MAPE, MAE, and RMSE are the total number of scatter points in each panel, coefficient of determination, mean absolute percentage error, mean absolute error, and root-mean-square-error, respectively.





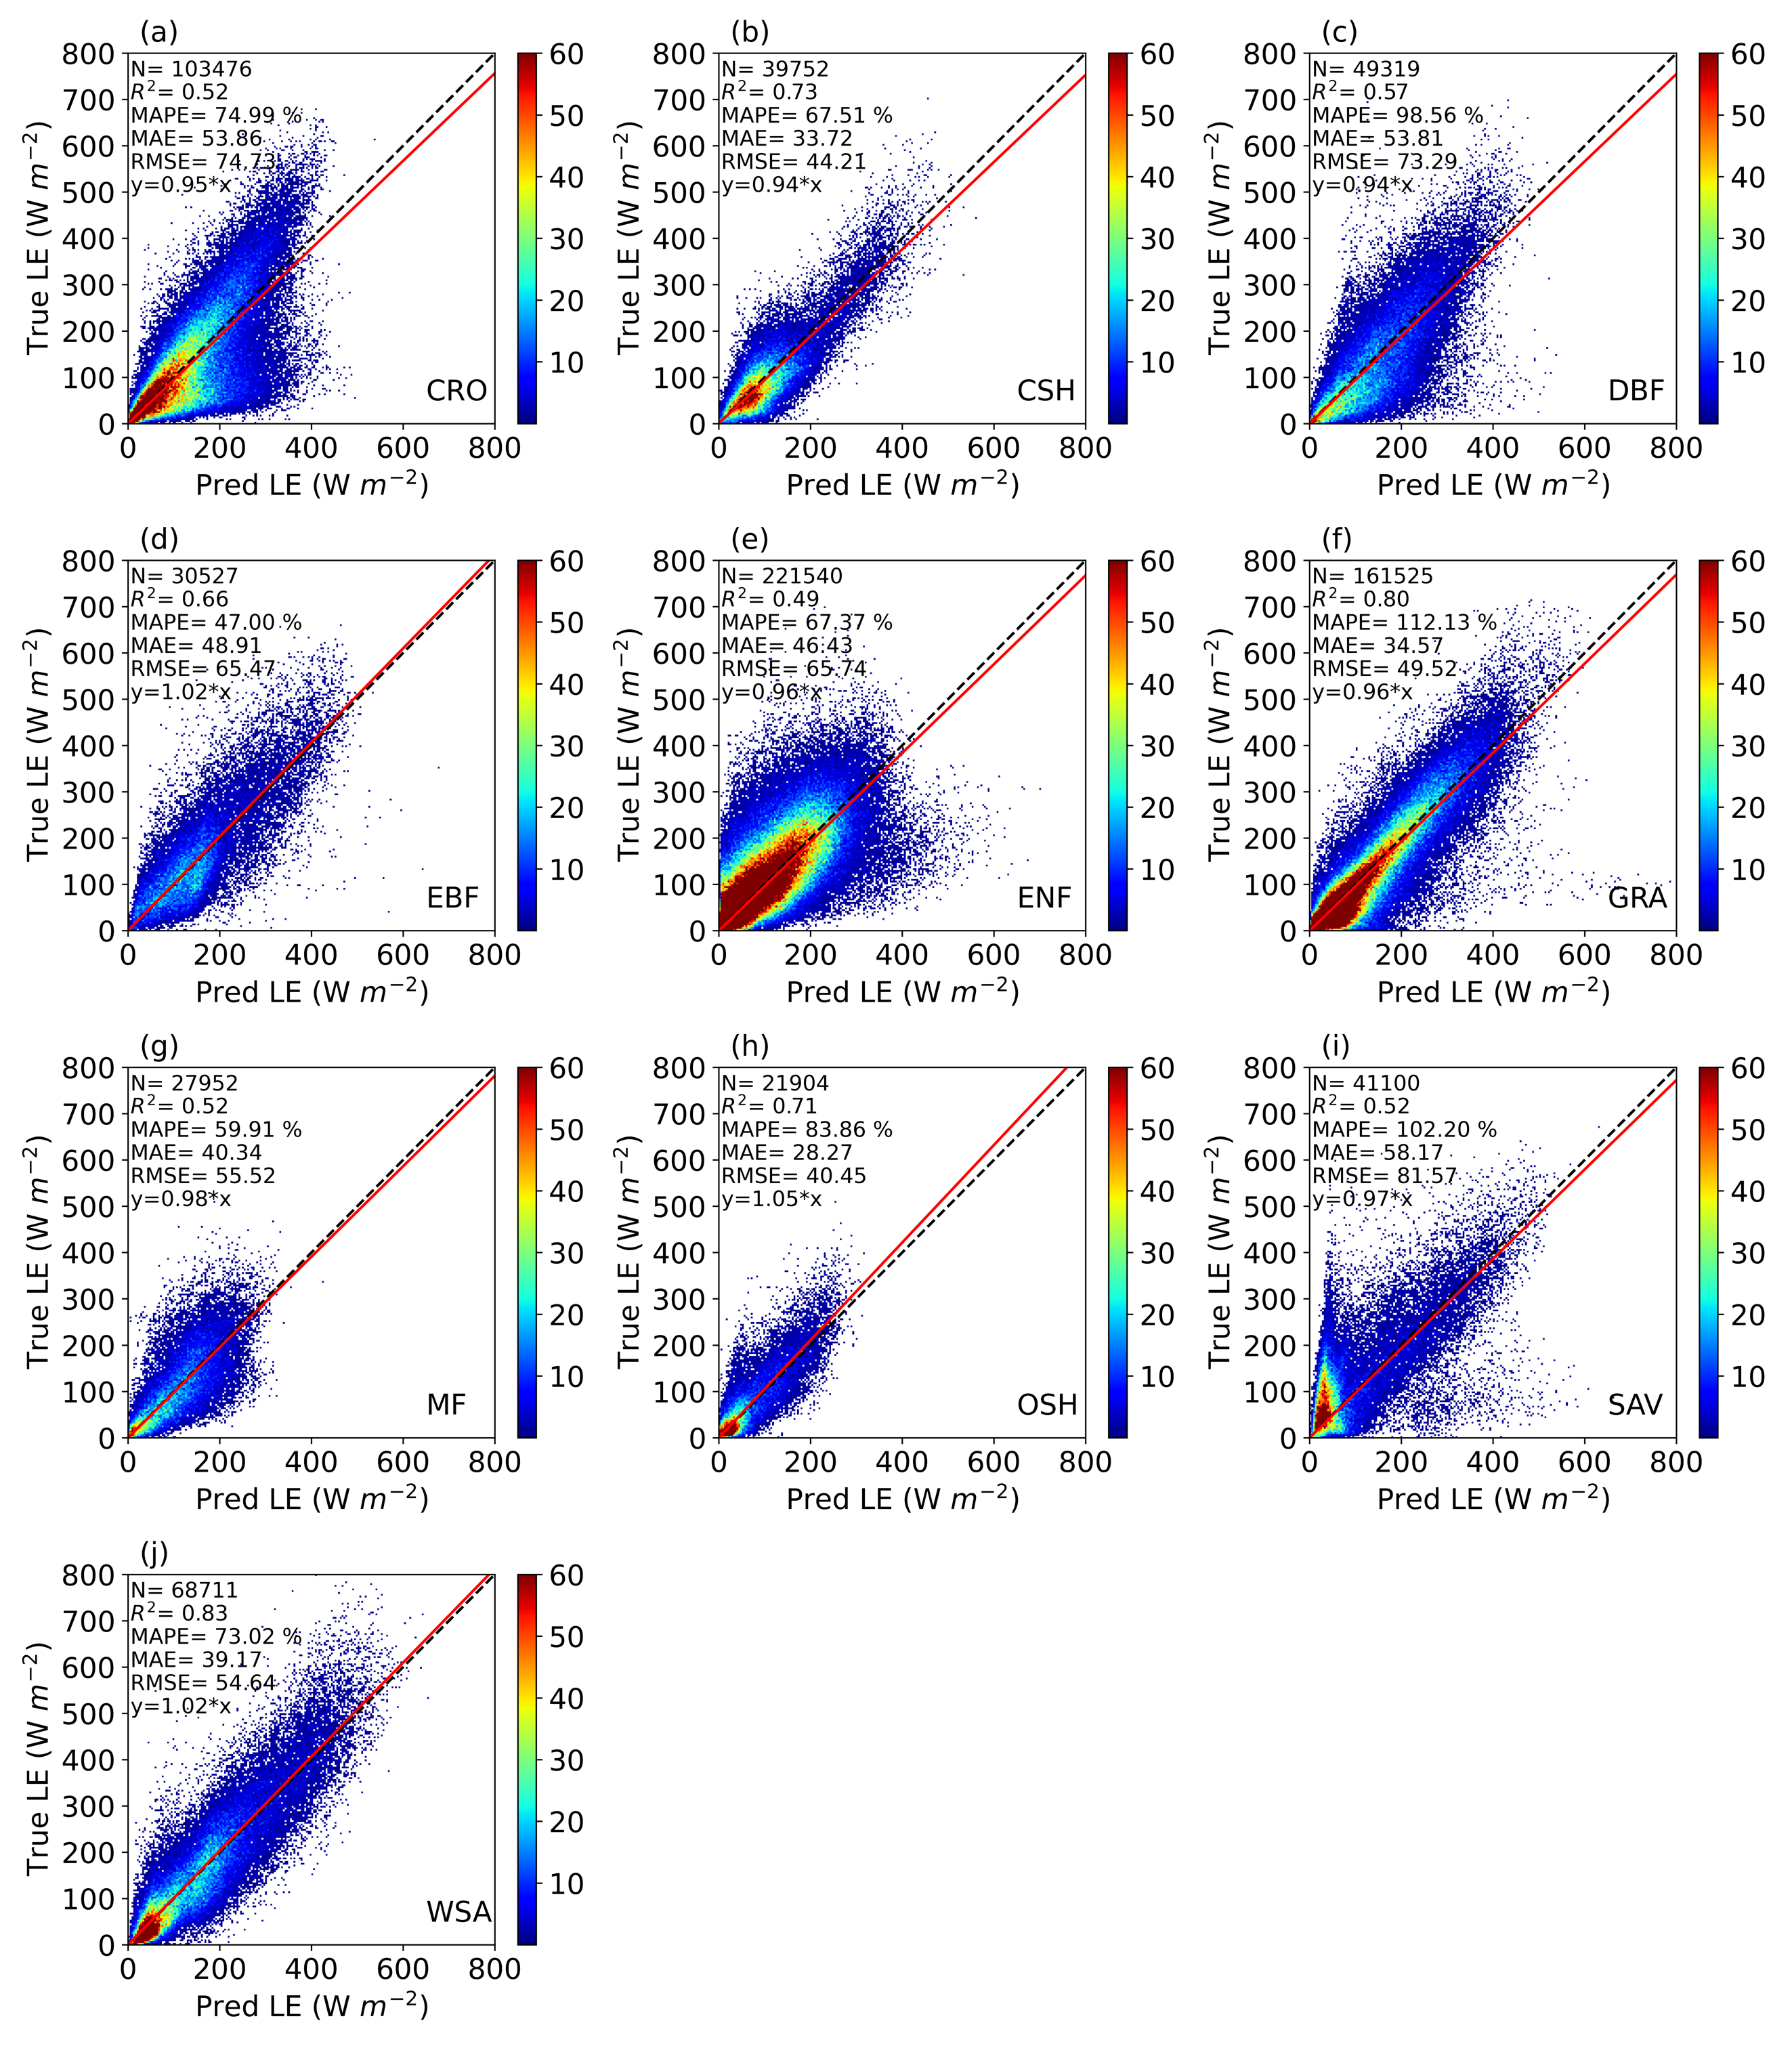


Fig. S13. Performance of the classic plant hydraulics (PHexp) model for predicting latent heat flux (LE) in different biomes for Configuration-1. The diagonal black dashed line is a 1:1 line, and the red solid line is the nonbiased linear regression line. The shaded colors represent the density of scatter points. N, , MAPE, MAE, and RMSE are the total number of scatter points in each panel, coefficient of determination, mean absolute percentage error, mean absolute error, and root-mean-square-error, respectively.

Fig. S14. Energy conservation in the classic plant hydraulic (PHexp) model’s outputs in different biomes for Configuration-1. The diagonal black dashed line is a 1:1 line, and the red solid line is the nonbiased linear regression line. The shaded colors represent the density of scatter points. N, , MAPE, MAE, and RMSE are the total number of scatter points in each panel, coefficient of determination, mean absolute percentage error, mean absolute error, and root-mean-square-error, respectively.





Fig. S15. Performance of the empirical model (EMP) for predicting latent heat flux (LE) in different biomes for Configuration-1. The diagonal black dashed line is a 1:1 line, and the red solid line is the nonbiased linear regression line. The shaded colors represent the density of scatter points. N, , MAPE, MAE, and RMSE are the total number of scatter points in each panel, coefficient of determination, mean absolute percentage error, mean absolute error, and root-mean-square-error, respectively.





Fig. S16. Energy conservation in the empirical model’s (EMP) output in different biomes for Configuration-1. The diagonal black dashed line is a 1:1 line, and the red solid line is the nonbiased linear regression line. The shaded colors represent the density of scatter points. N, , MAPE, MAE, and RMSE are the total number of scatter points in each panel, coefficient of determination, mean absolute percentage error, mean absolute error, and root-mean-square-error, respectively.





Fig. S17. Performance of the machine learning (ML) model for predicting plant transpiration (T) in different biomes for Configuration-2 (TEA). The diagonal black dashed line is a 1:1 line, and the red solid line is the nonbiased linear regression line. The shaded colors represent the density of scatter points. N, , MAPE, MAE, and RMSE are the total number of scatter points in each panel, coefficient of determination, mean absolute percentage error, mean absolute error, and root-mean-square-error, respectively.





Fig. S18. Performance of the ML-based plant hydraulics (PHimp) model for predicting plant transpiration (T) in different biomes for Configuration-2 (TEA). The diagonal black dashed line is a 1:1 line, and the red solid line is the nonbiased linear regression line. The shaded colors represent the density of scatter points. N, , MAPE, MAE, and RMSE are the total number of scatter points in each panel, coefficient of determination, mean absolute percentage error, mean absolute error, and root-mean-square-error, respectively.


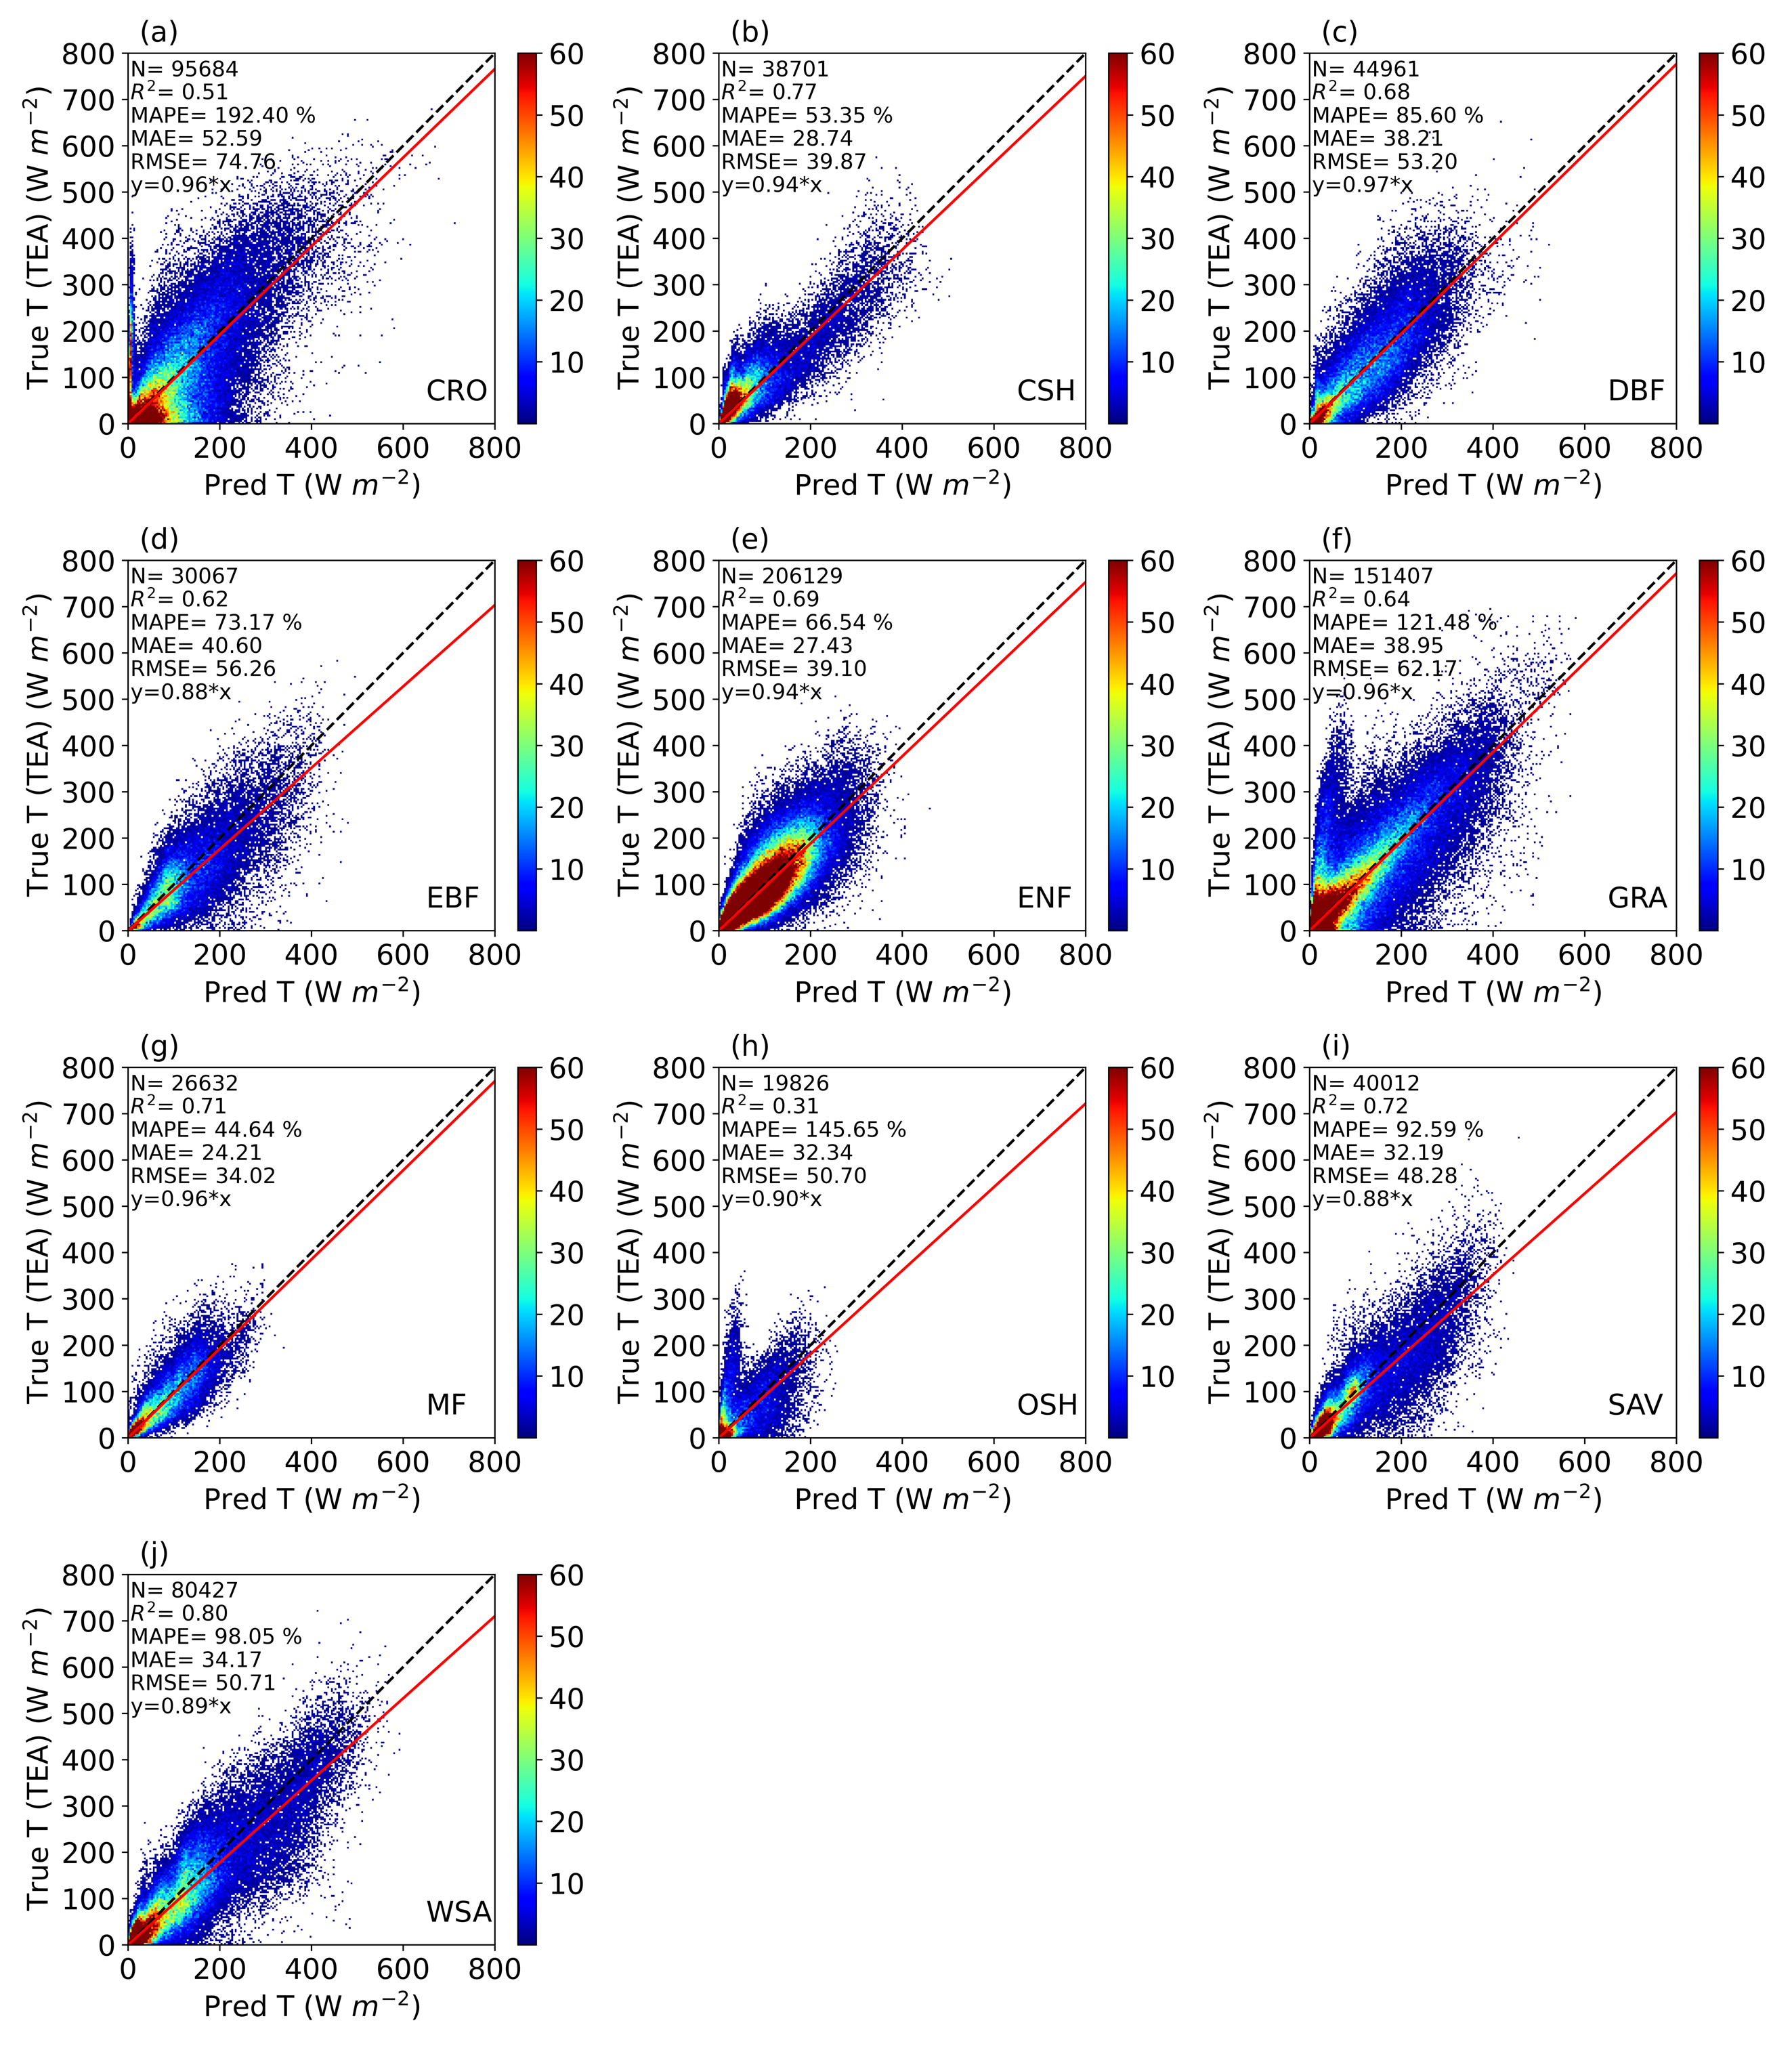


Fig. S19. Performance of the classic plant hydraulics (PHexp) model for predicting plant transpiration (T) in different biomes for Configuration-2 (TEA). The diagonal black dashed line is a 1:1 line, and the red solid line is the nonbiased linear regression line. The shaded colors represent the density of scatter points. N, , MAPE, MAE, and RMSE are the total number of scatter points in each panel, coefficient of determination, mean absolute percentage error, mean absolute error, and root-mean-square-error, respectively.


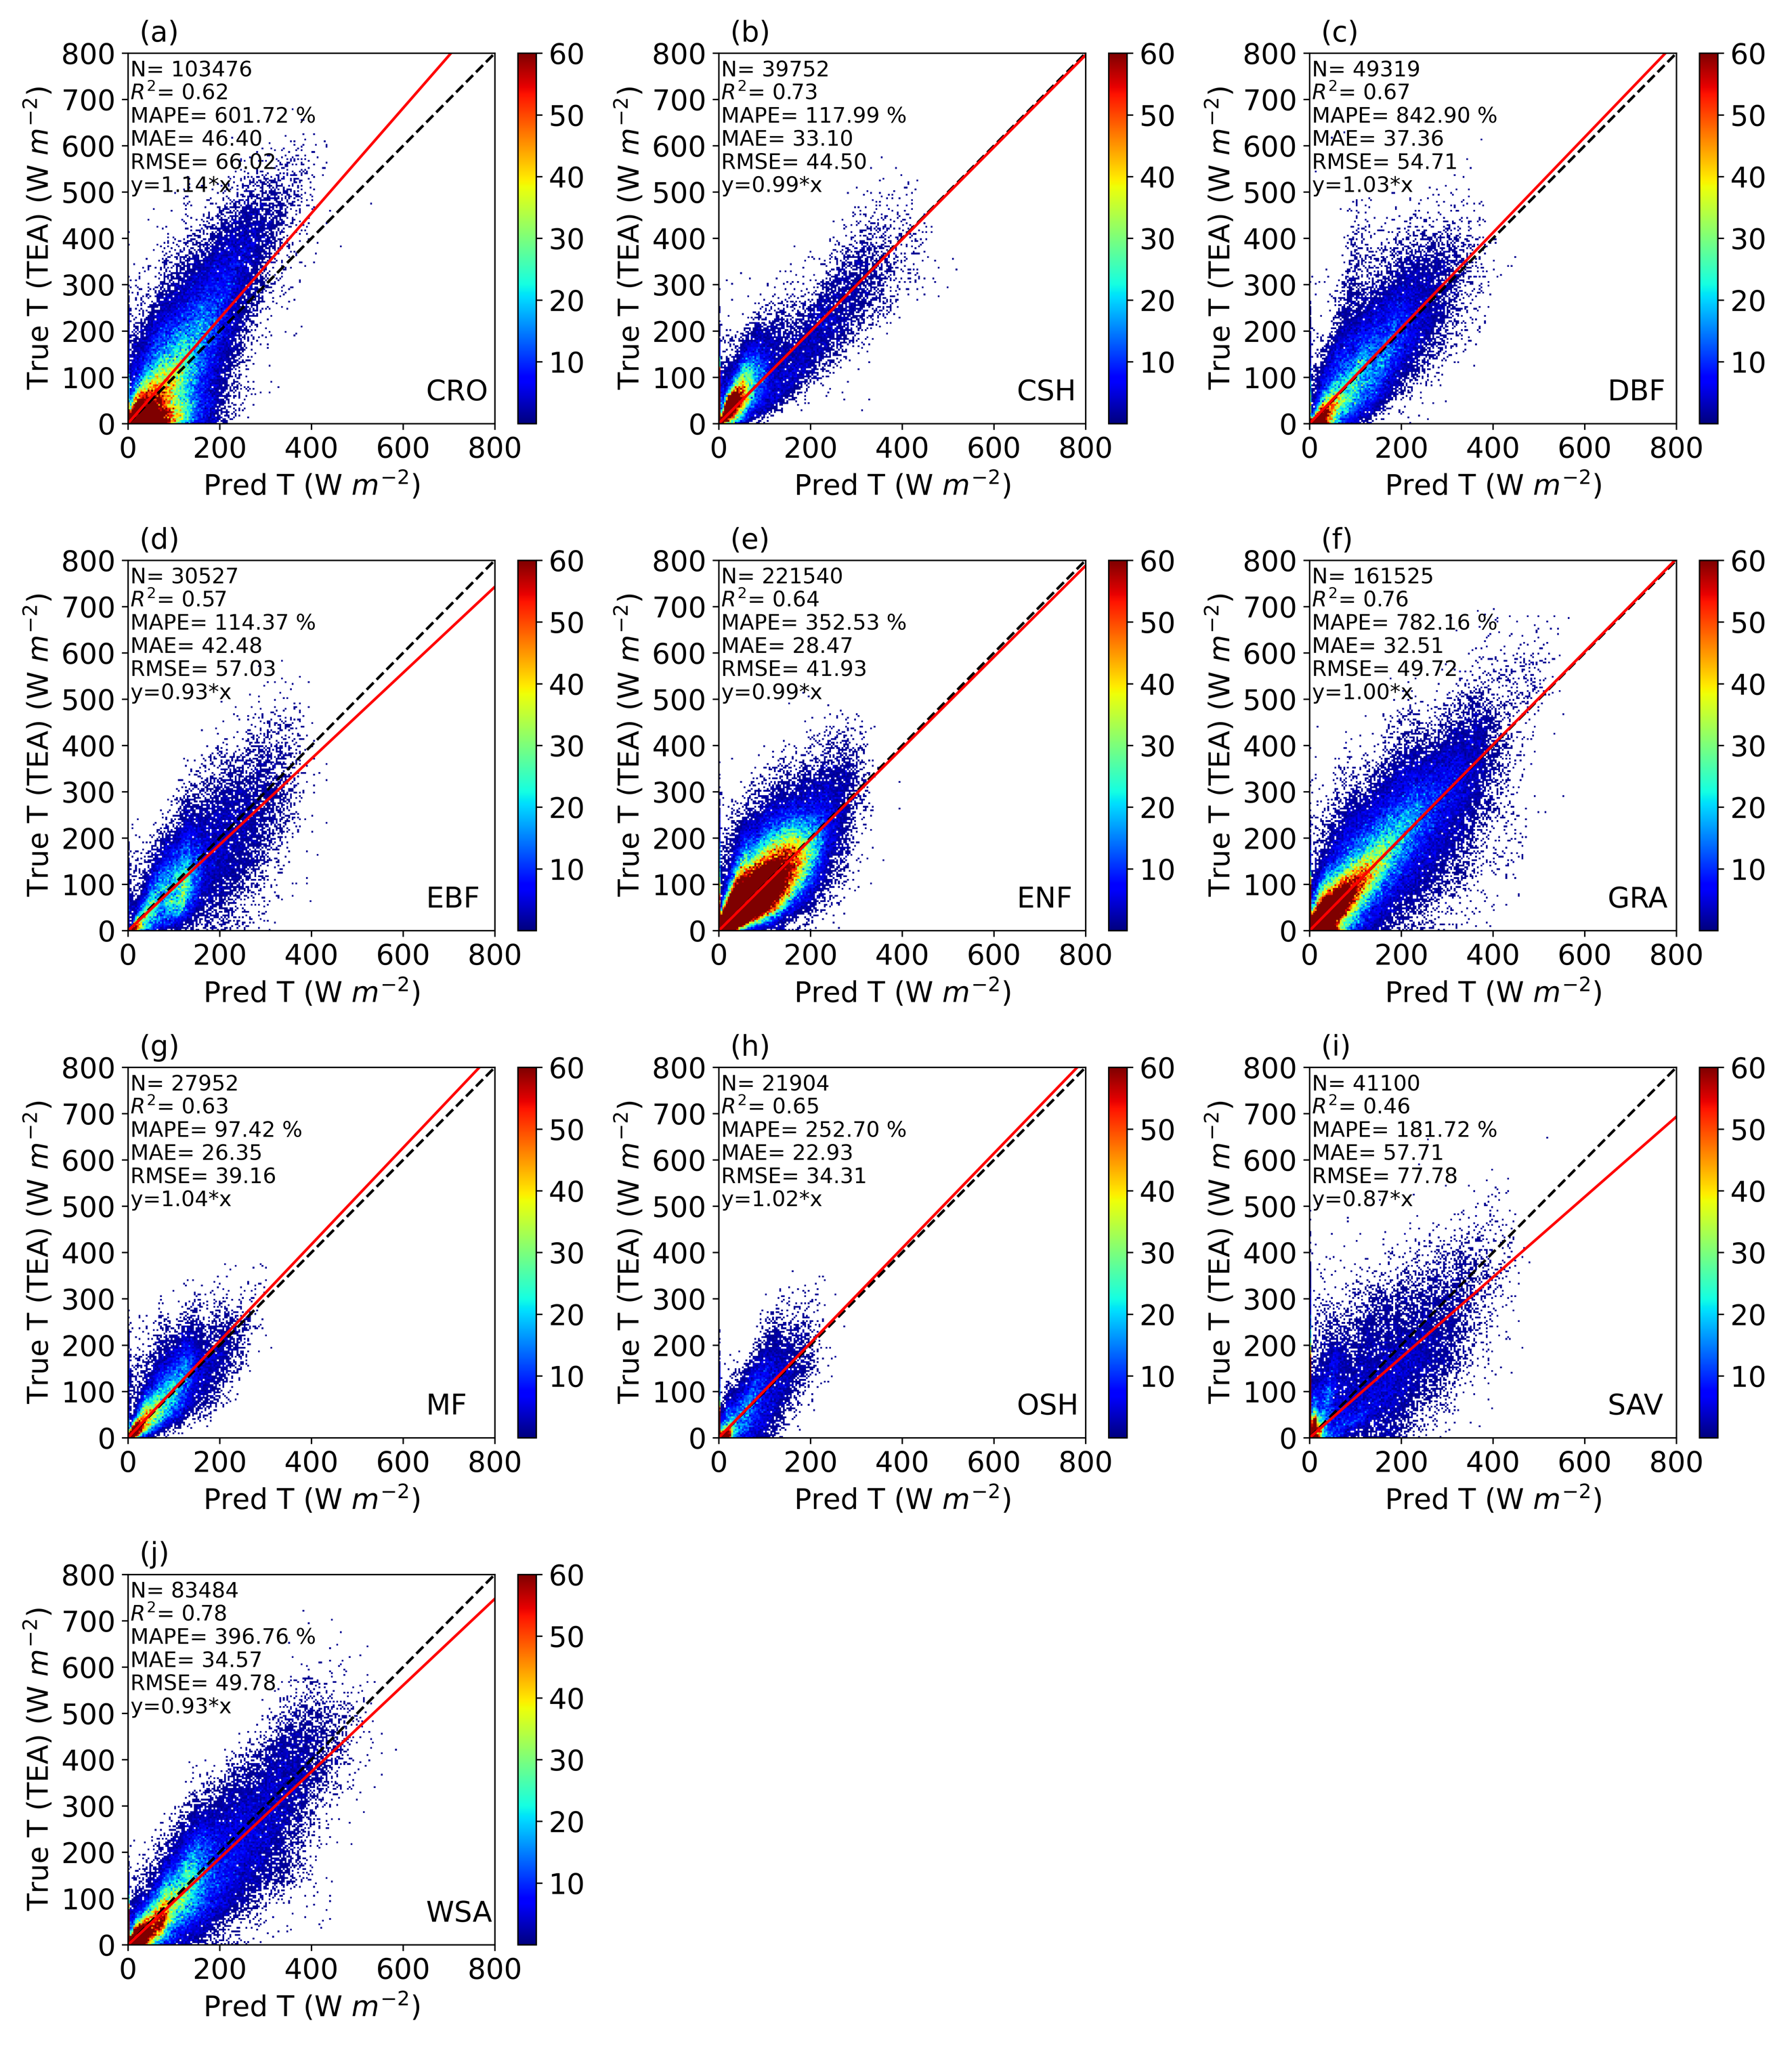


Fig. S20. Performance of the empirical model (EMP) for predicting plant transpiration (T) in different biomes for Configuration-2 (TEA). The diagonal black dashed line is a 1:1 line, and the red solid line is the nonbiased linear regression line. The shaded colors represent the density of scatter points. N, , MAPE, MAE, and RMSE are the total number of scatter points in each panel, coefficient of determination, mean absolute percentage error, mean absolute error, and root-mean-square-error, respectively.





| 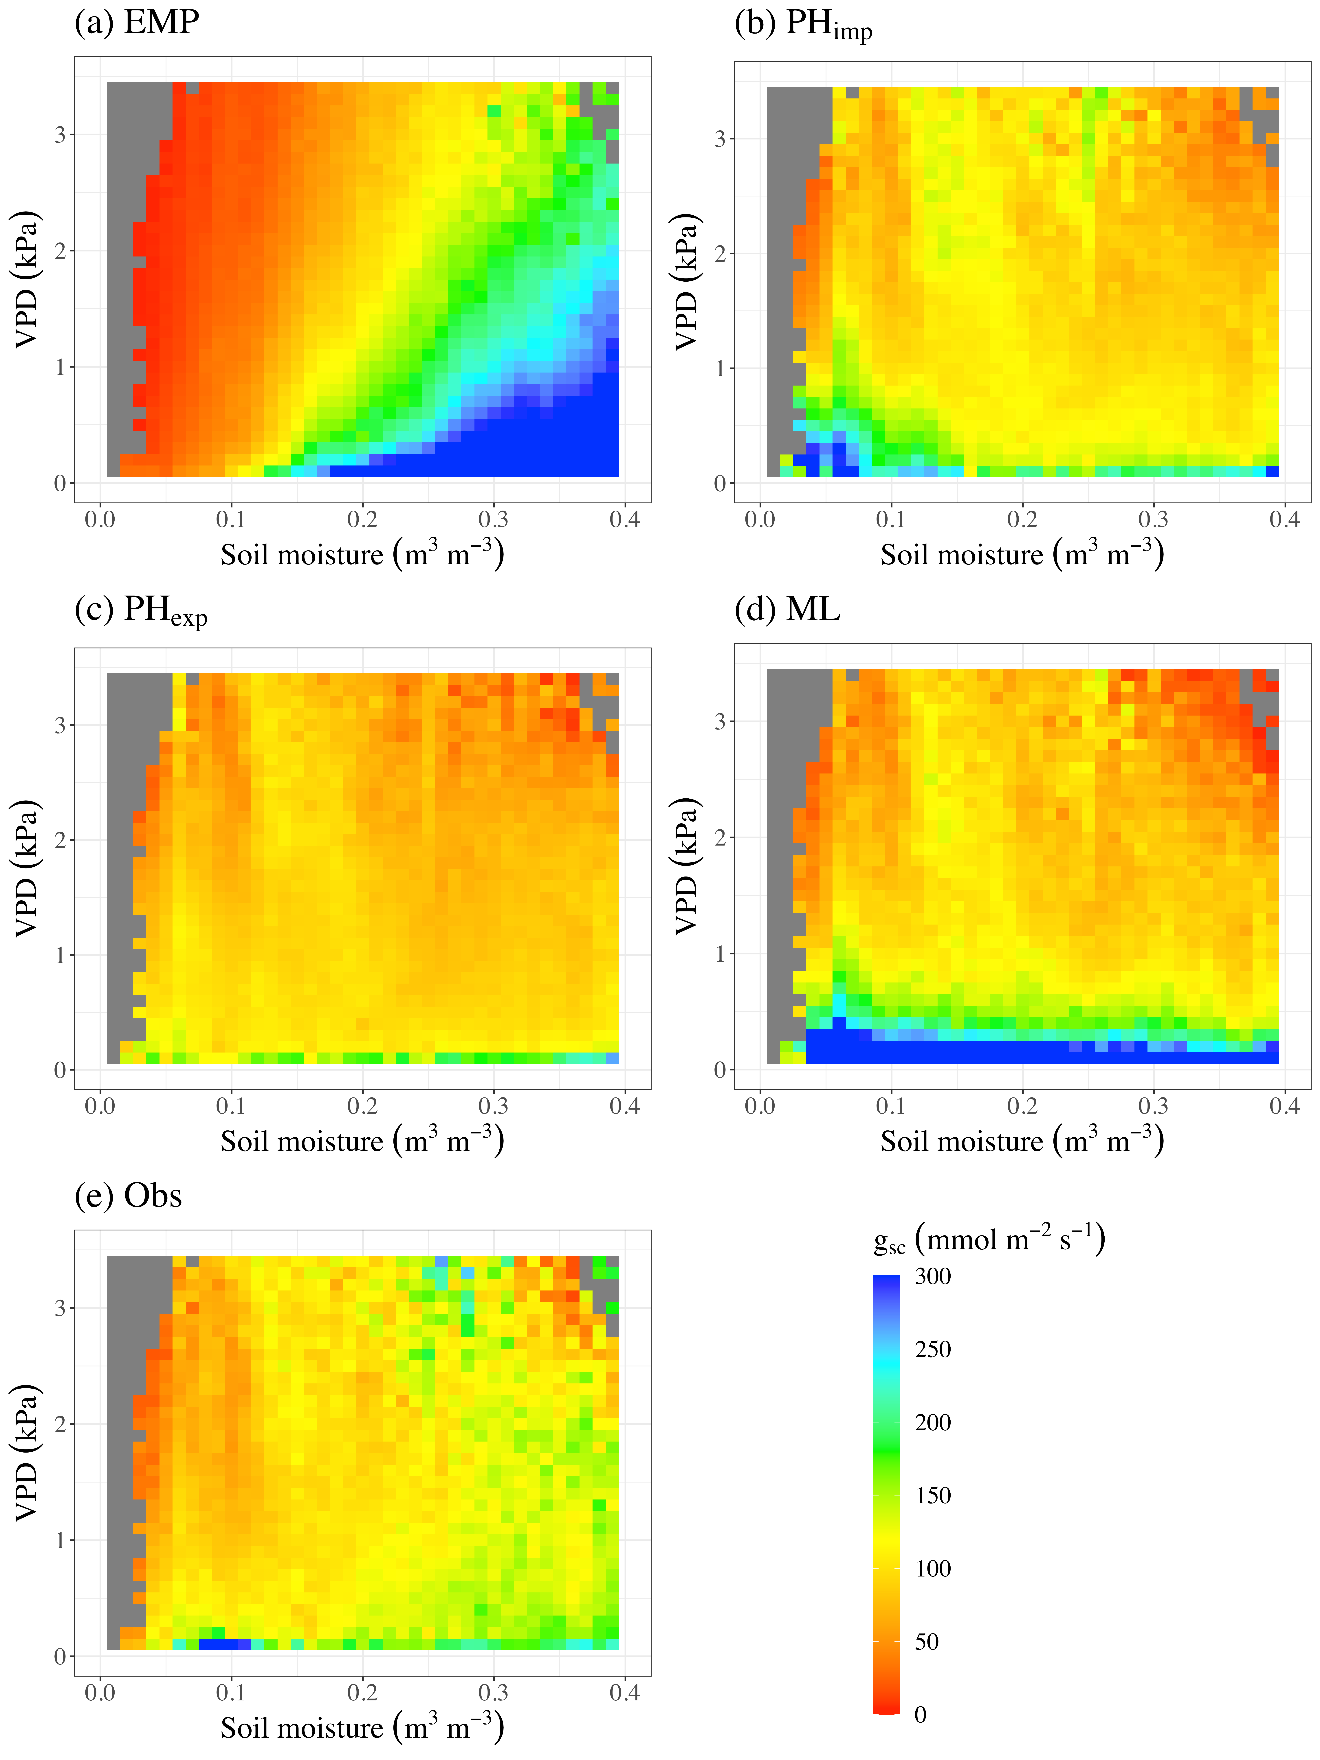 |
| --- |
| Fig. S21. Stomatal conductance () co-regulated by VPD and soil moisture (SM). Co-regulation pattern for obtained from the (a) empirical model (EMP), (b) implicit representation of plant hydraulics model (PHimp), (c) explicit representation of plant hydraulics model (PHexp), (d) pure machine learning model (ML), and (e) observations. Note that the results here are shown for the case when model calibration is performed against evapotranspiration (ET) only (i.e., Configuration-1). |

| 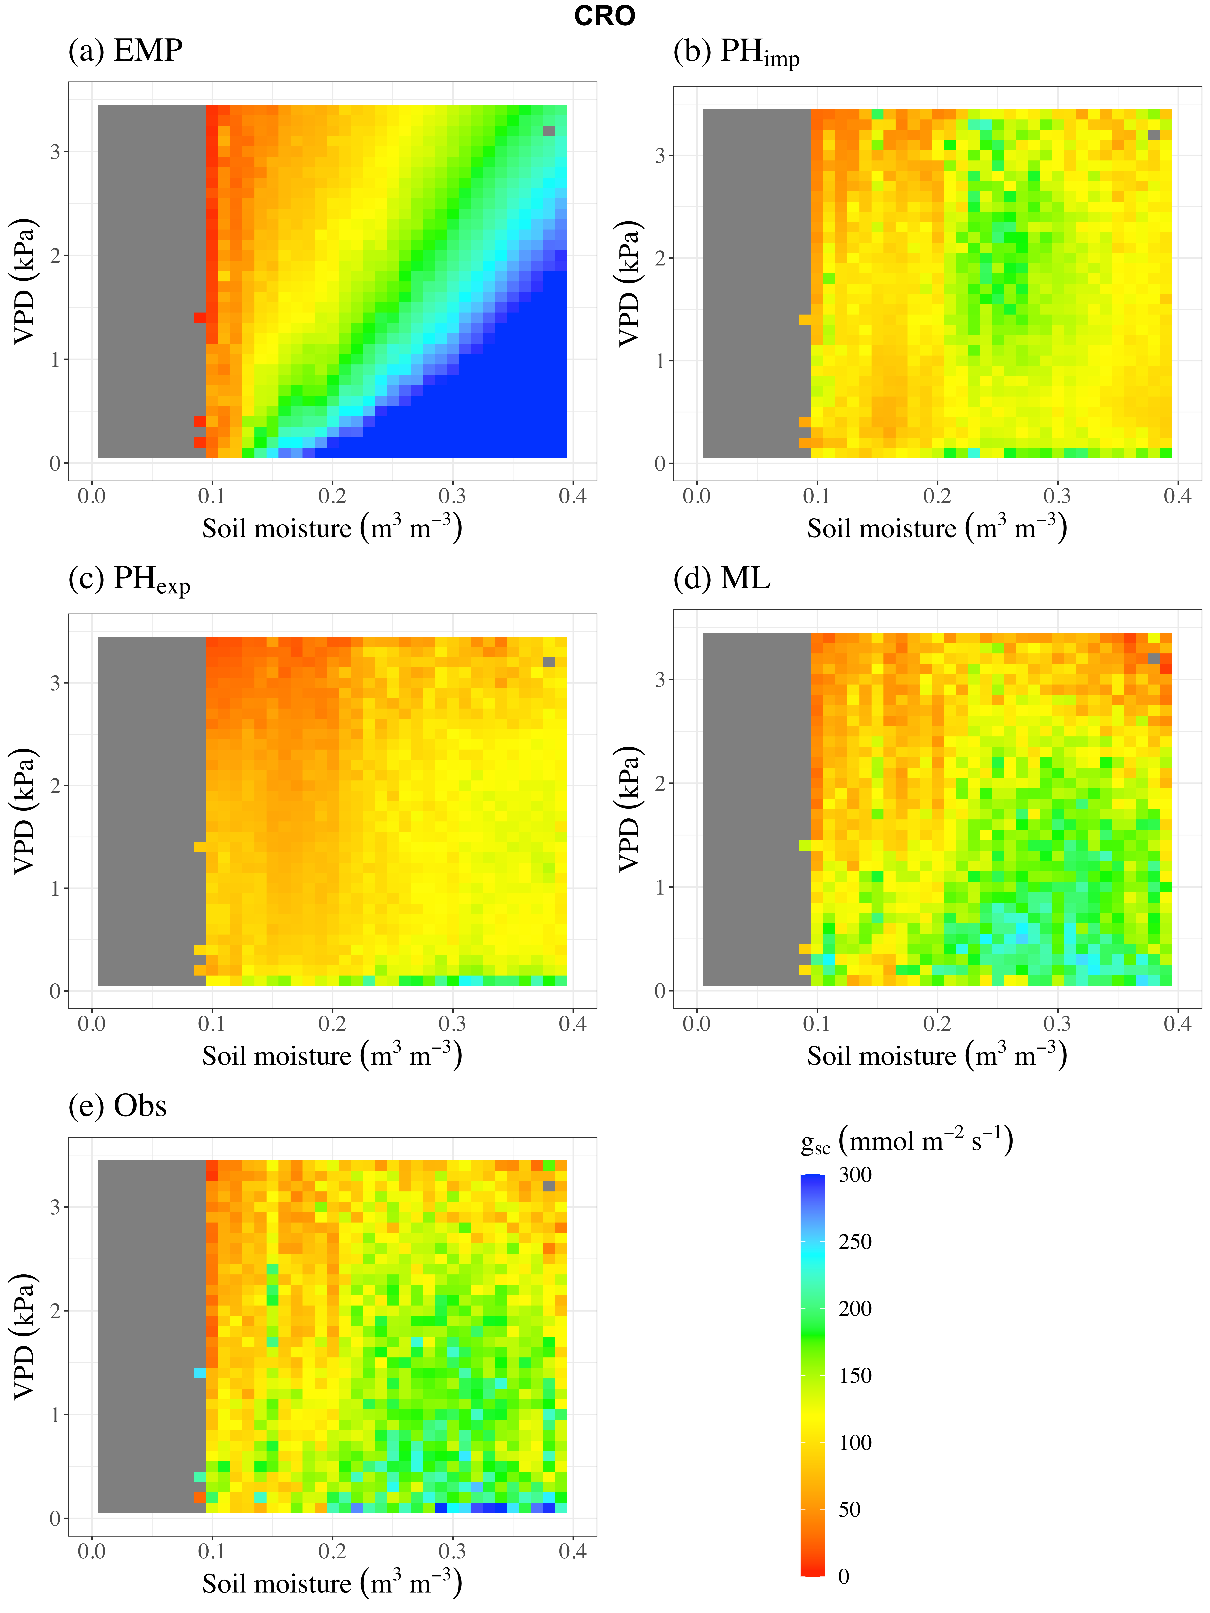 |
| --- |
| Fig. S22. Stomatal conductance () co-regulated by VPD and soil moisture (SM) in Croplands (CRO) settings. Co-regulation pattern for obtained from (a) empirical model (EMP), (b) implicit representation of plant hydraulics model (PHimp), (c) explicit representation of plant hydraulics model (PHexp), (d) pure machine learning model (ML), and (e) observations. Note that the results here are shown for the case when model calibration is performed against both evapotranspiration (ET) and TEA-obtained plant transpiration (T) (i.e., Configuration-2 with TEA). |

| 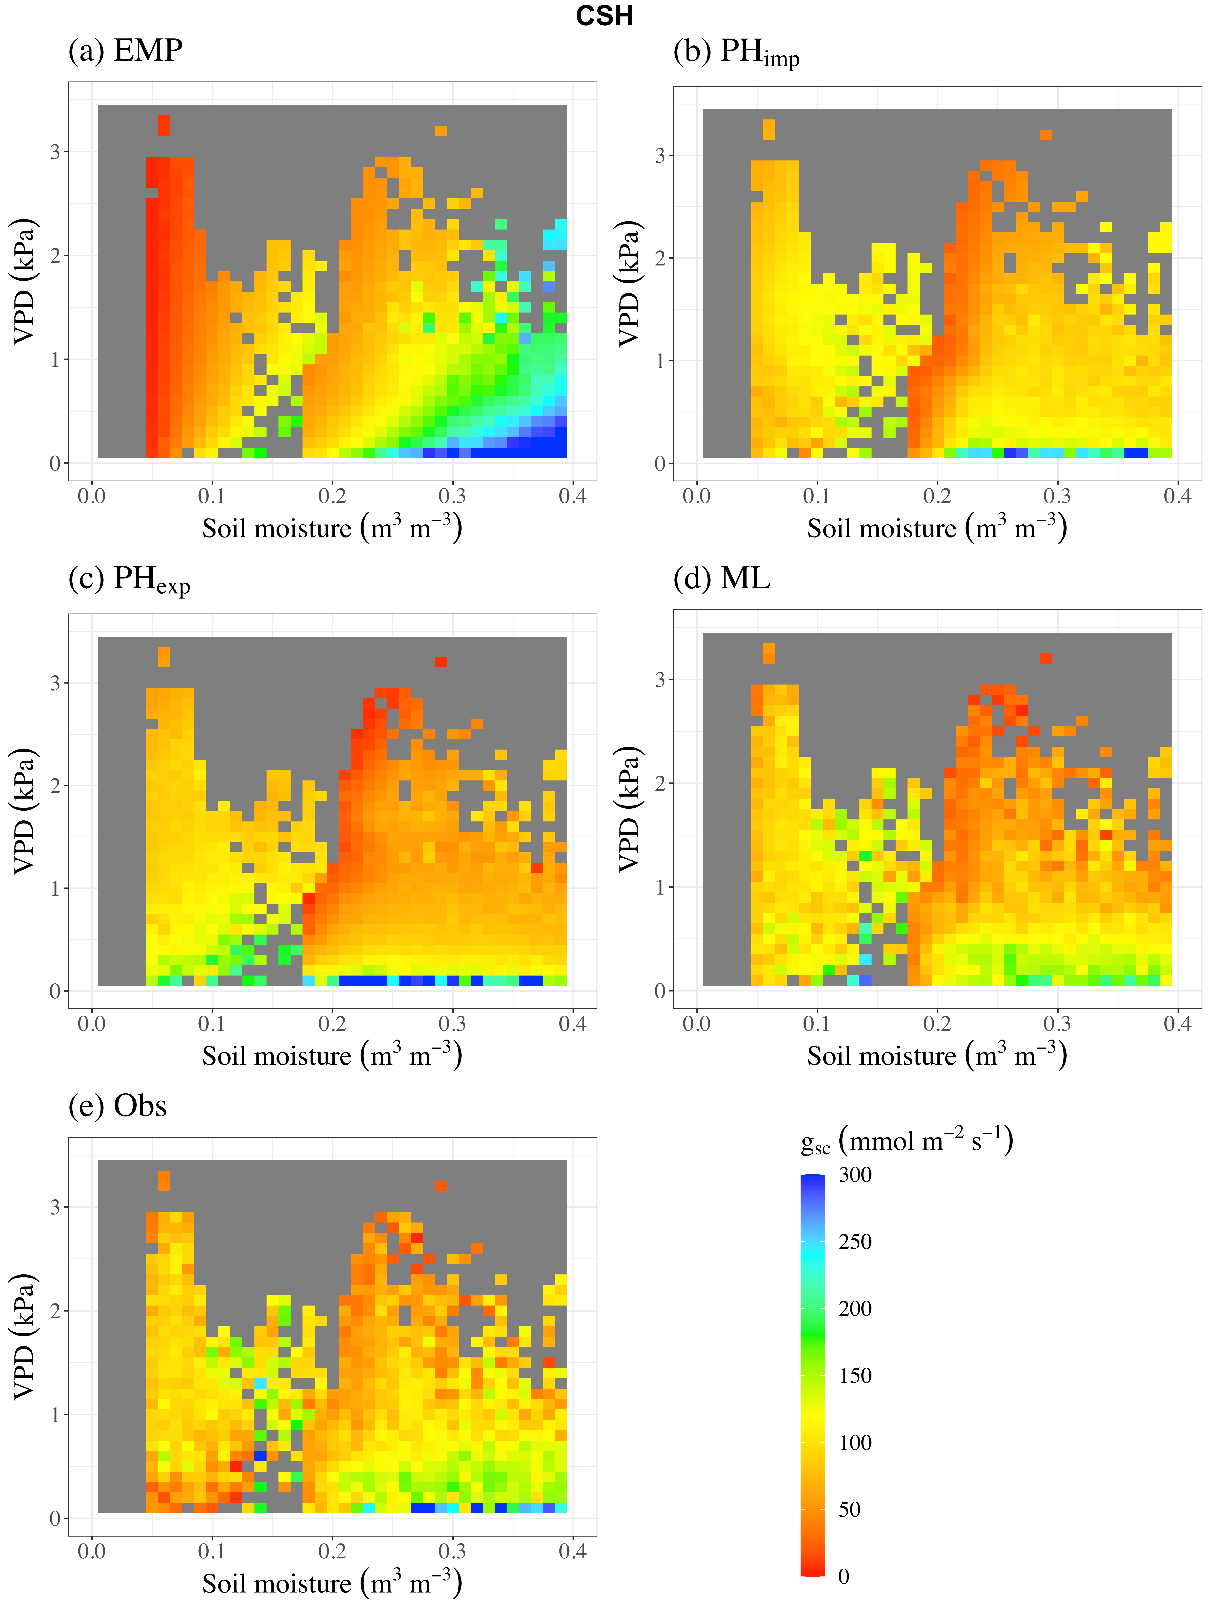 |
| --- |
| Fig. S23. Stomatal conductance () co-regulated by VPD and soil moisture (SM) in Closed Shrublands (CSH) settings. Co-regulation pattern for obtained from (a) empirical model (EMP), (b) implicit representation of plant hydraulics model (PHimp), (c) explicit representation of plant hydraulics model (PHexp), (d) pure machine learning model (ML), and (e) observations. Note that the results here are shown for the case when model calibration is performed against both evapotranspiration (ET) and TEA-obtained plant transpiration (T) (i.e., Configuration-2 with TEA). |

| 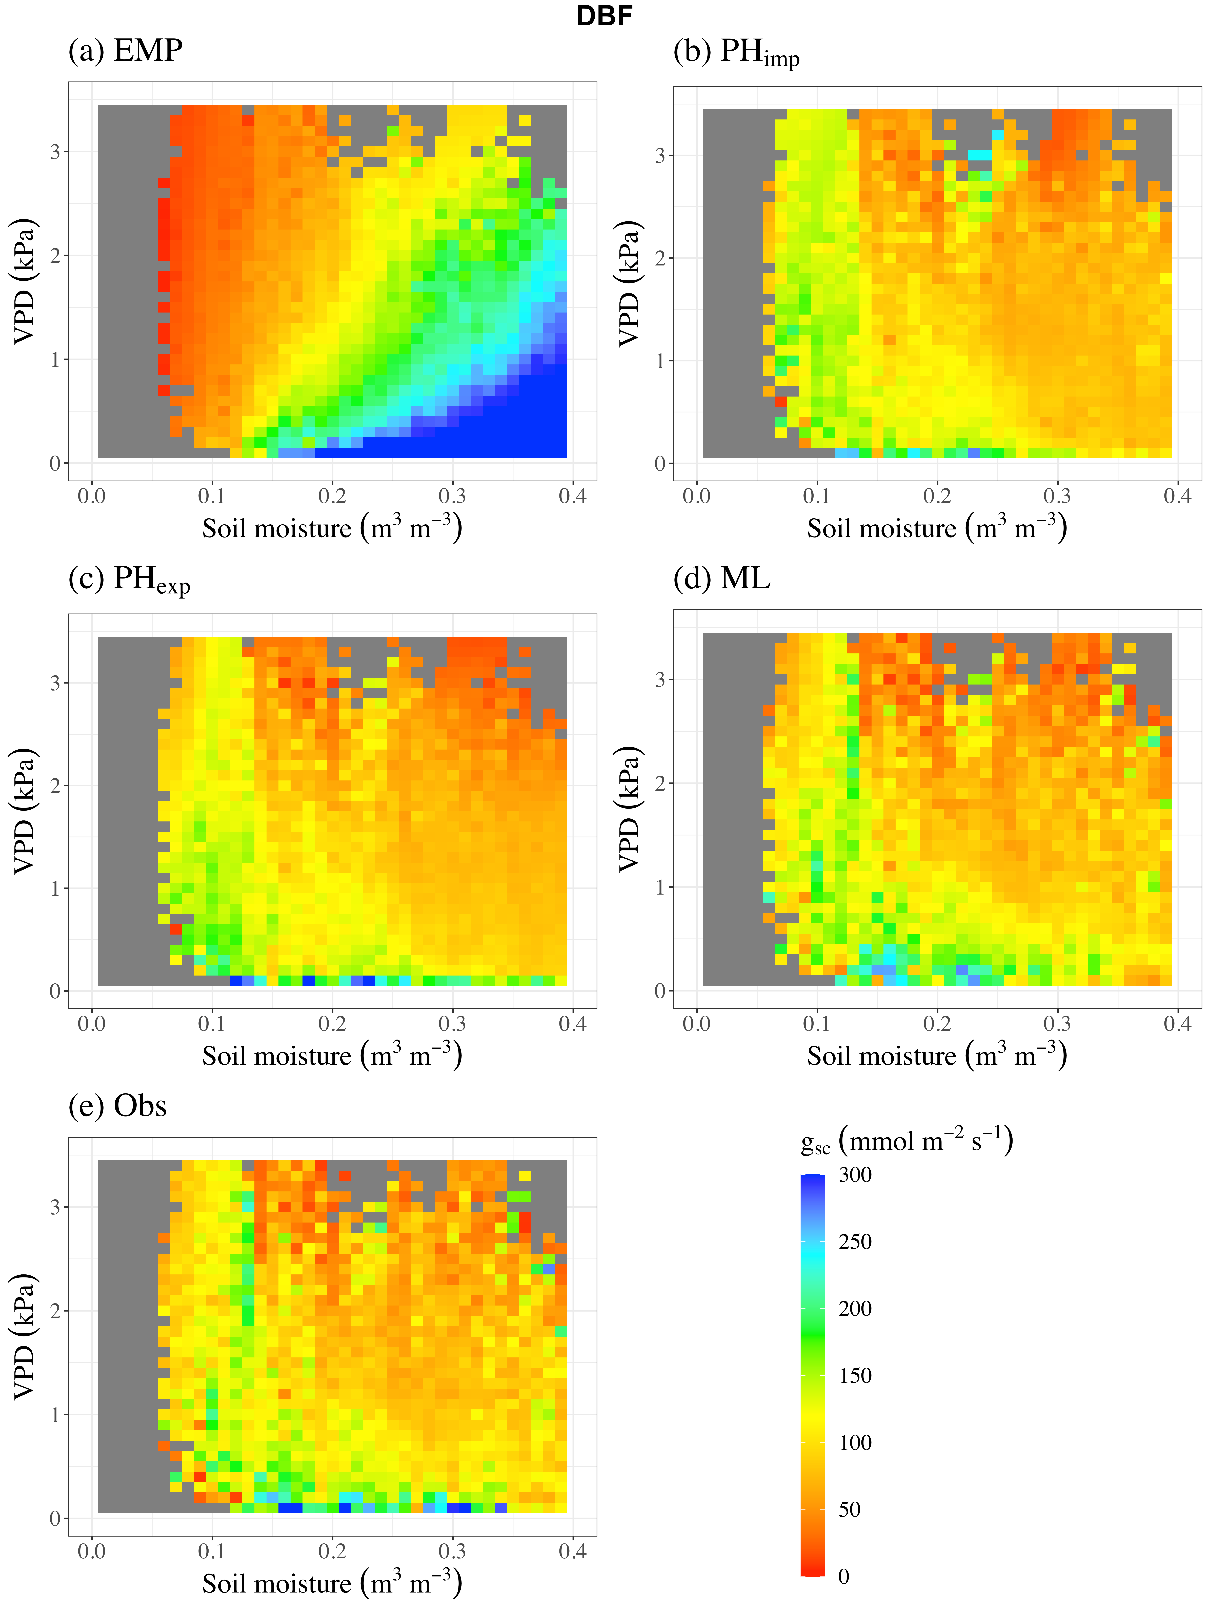 |
| --- |
| Fig. S24. Stomatal conductance () co-regulated by VPD and soil moisture (SM) in Deciduous Broadleaf Forests (DBF) settings. Co-regulation pattern for obtained from (a) empirical model (EMP), (b) implicit representation of plant hydraulics model (PHimp), (c) explicit representation of plant hydraulics model (PHexp), (d) pure machine learning model (ML), and (e) observations. Note that the results here are shown for the case when model calibration is performed against both evapotranspiration (ET) and TEA-obtained plant transpiration (T) (i.e., Configuration-2 with TEA). |

| 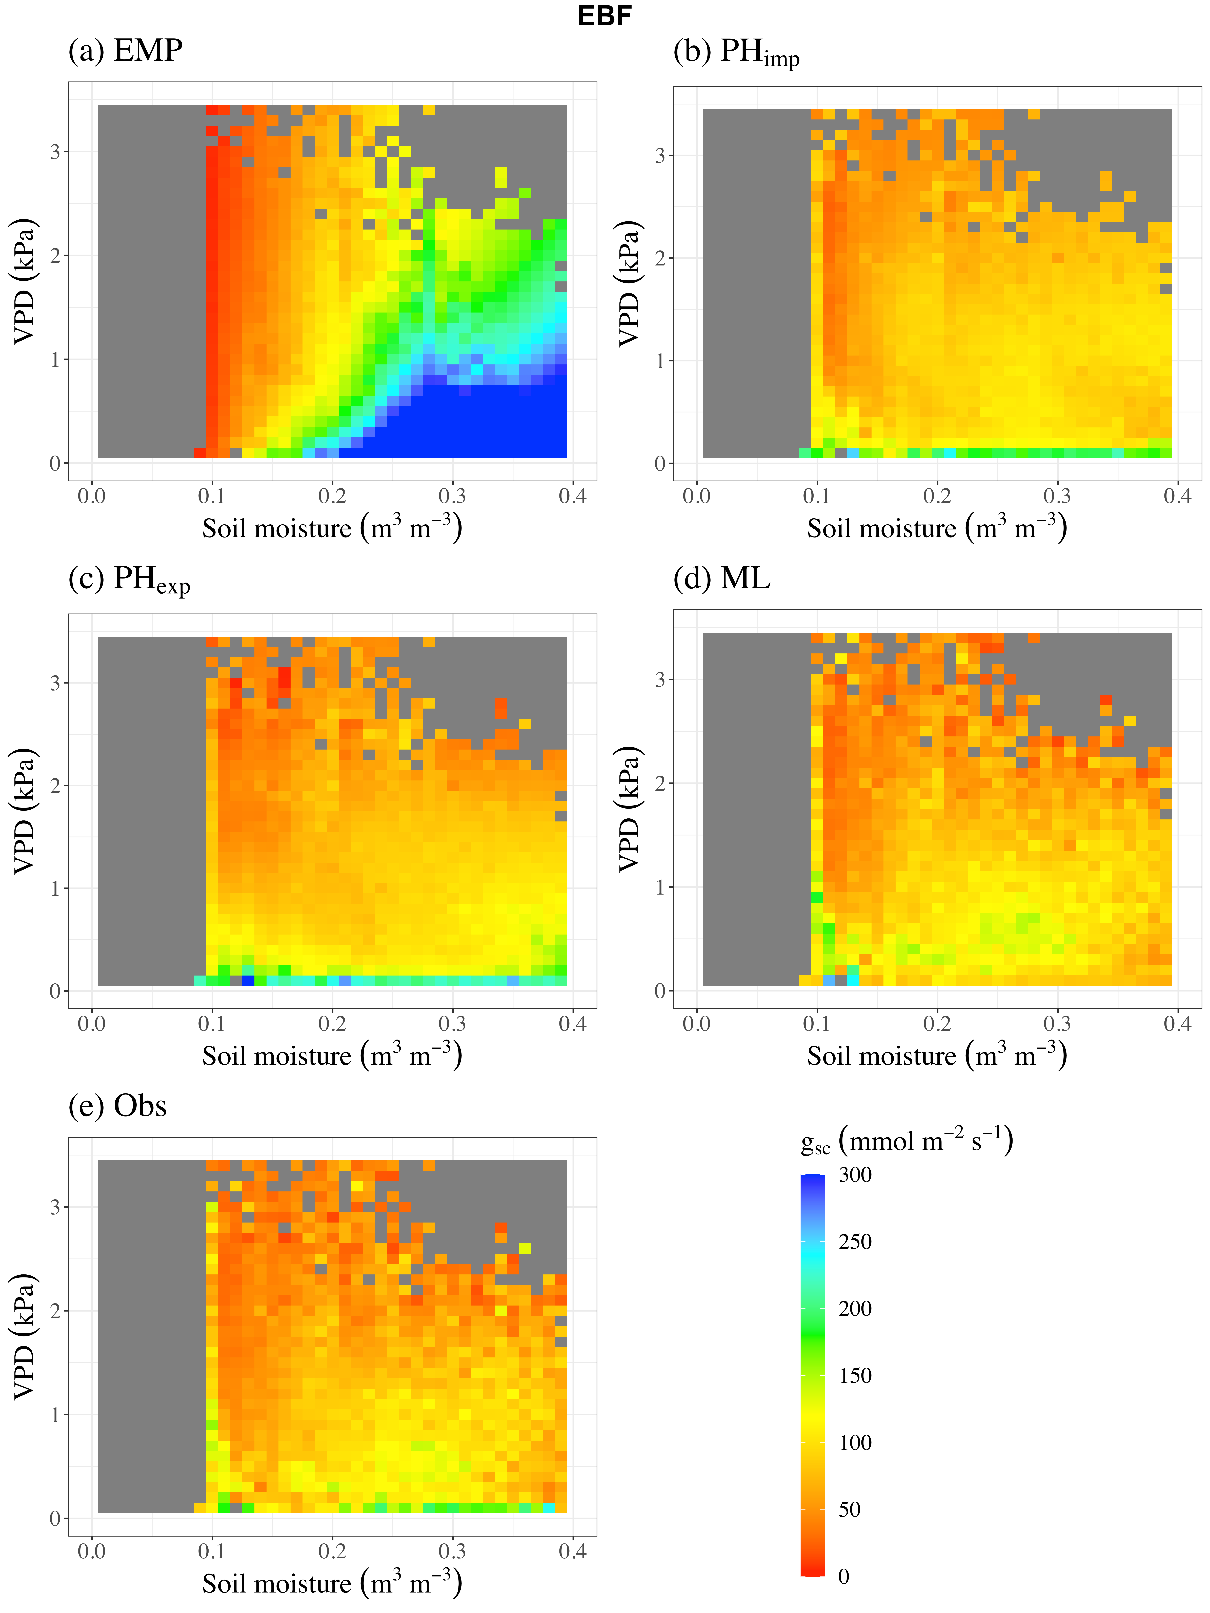 |
| --- |
| Fig. S25. Stomatal conductance () co-regulated by VPD and soil moisture (SM) in Evergreen Broadleaf Forests (EBF) settings. Co-regulation pattern for obtained from (a) empirical model (EMP), (b) implicit representation of plant hydraulics model (PHimp), (c) explicit representation of plant hydraulics model (PHexp), (d) pure machine learning model (ML), and (e) observations. Note that the results here are shown for the case when model calibration is performed against both evapotranspiration (ET) and TEA-obtained plant transpiration (T) (i.e., Configuration-2 with TEA). |

| 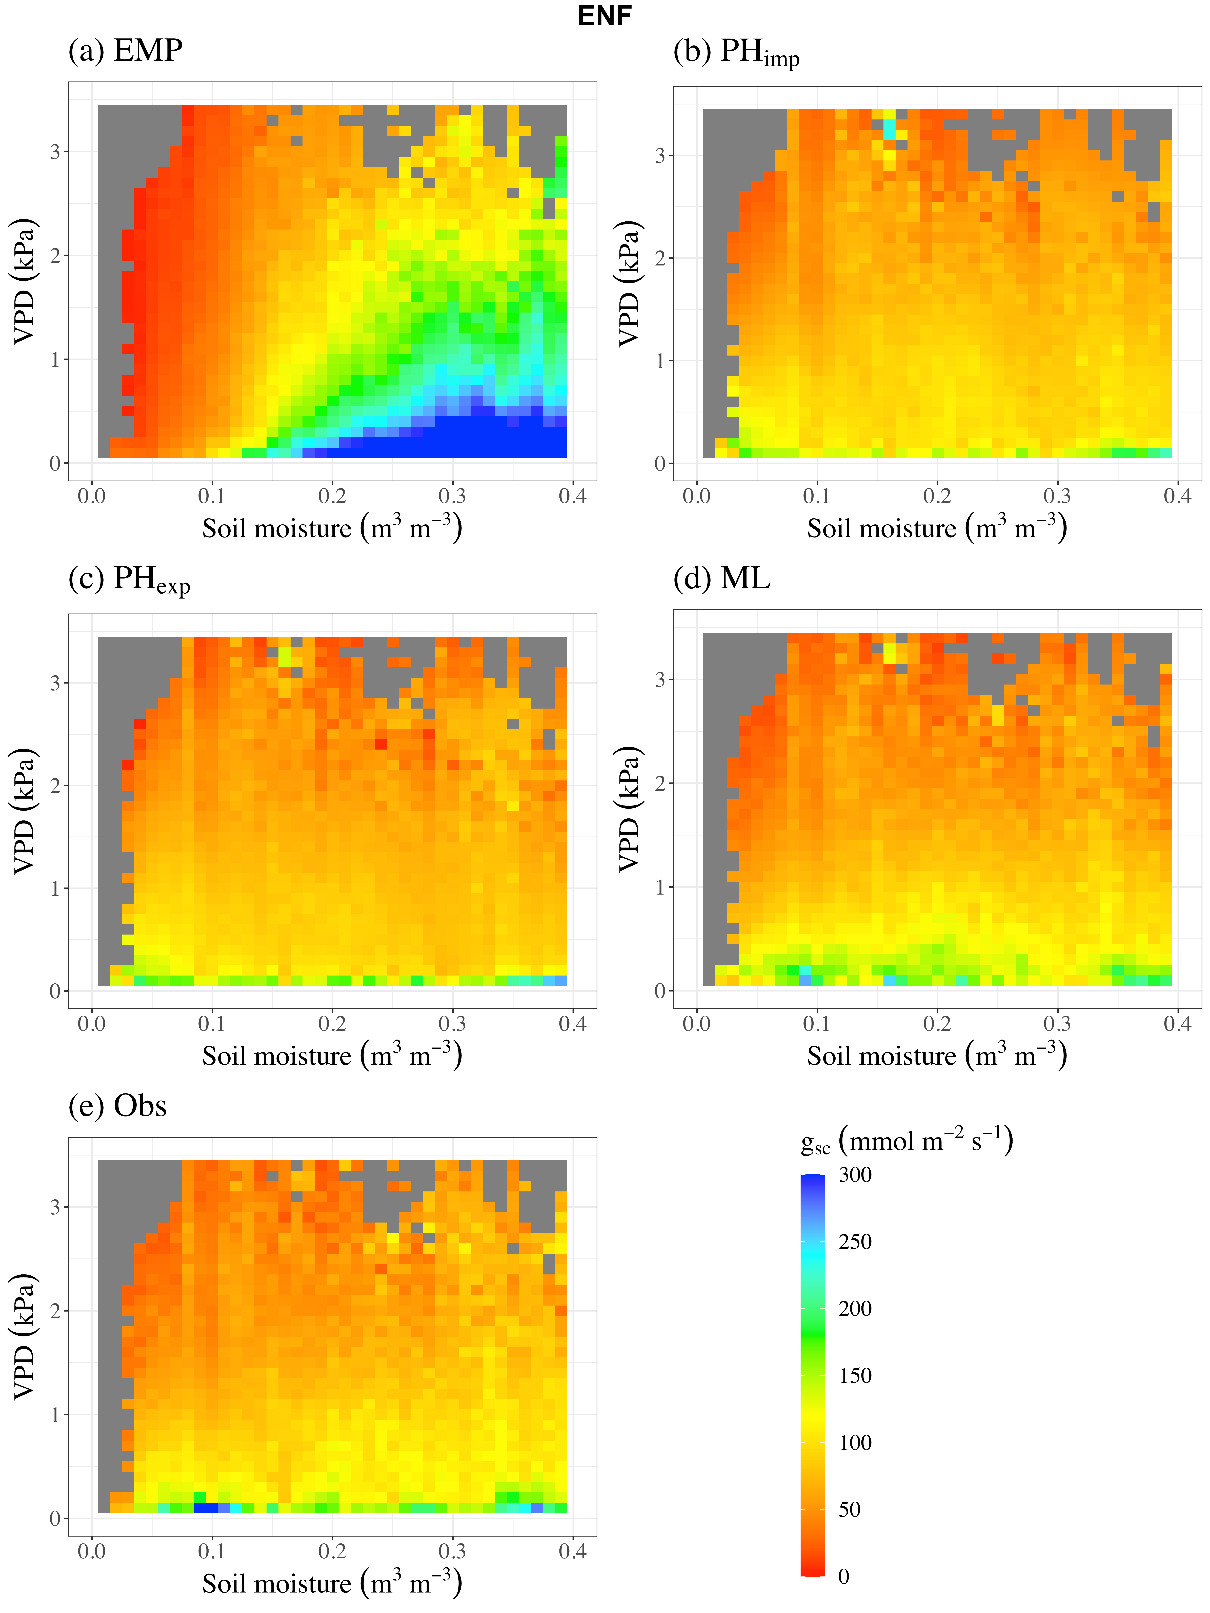 |
| --- |
| Fig. S26. Stomatal conductance () co-regulated by VPD and soil moisture (SM) in Evergreen Needleleaf Forests (ENF) settings. Co-regulation pattern for obtained from (a) empirical model (EMP), (b) implicit representation of plant hydraulics model (PHimp), (c) explicit representation of plant hydraulics model (PHexp), (d) pure machine learning model (ML), and (e) observations. Note that the results here are shown for the case when model calibration is performed against both evapotranspiration (ET) and TEA-obtained plant transpiration (T) (i.e., Configuration-2 with TEA). |

| 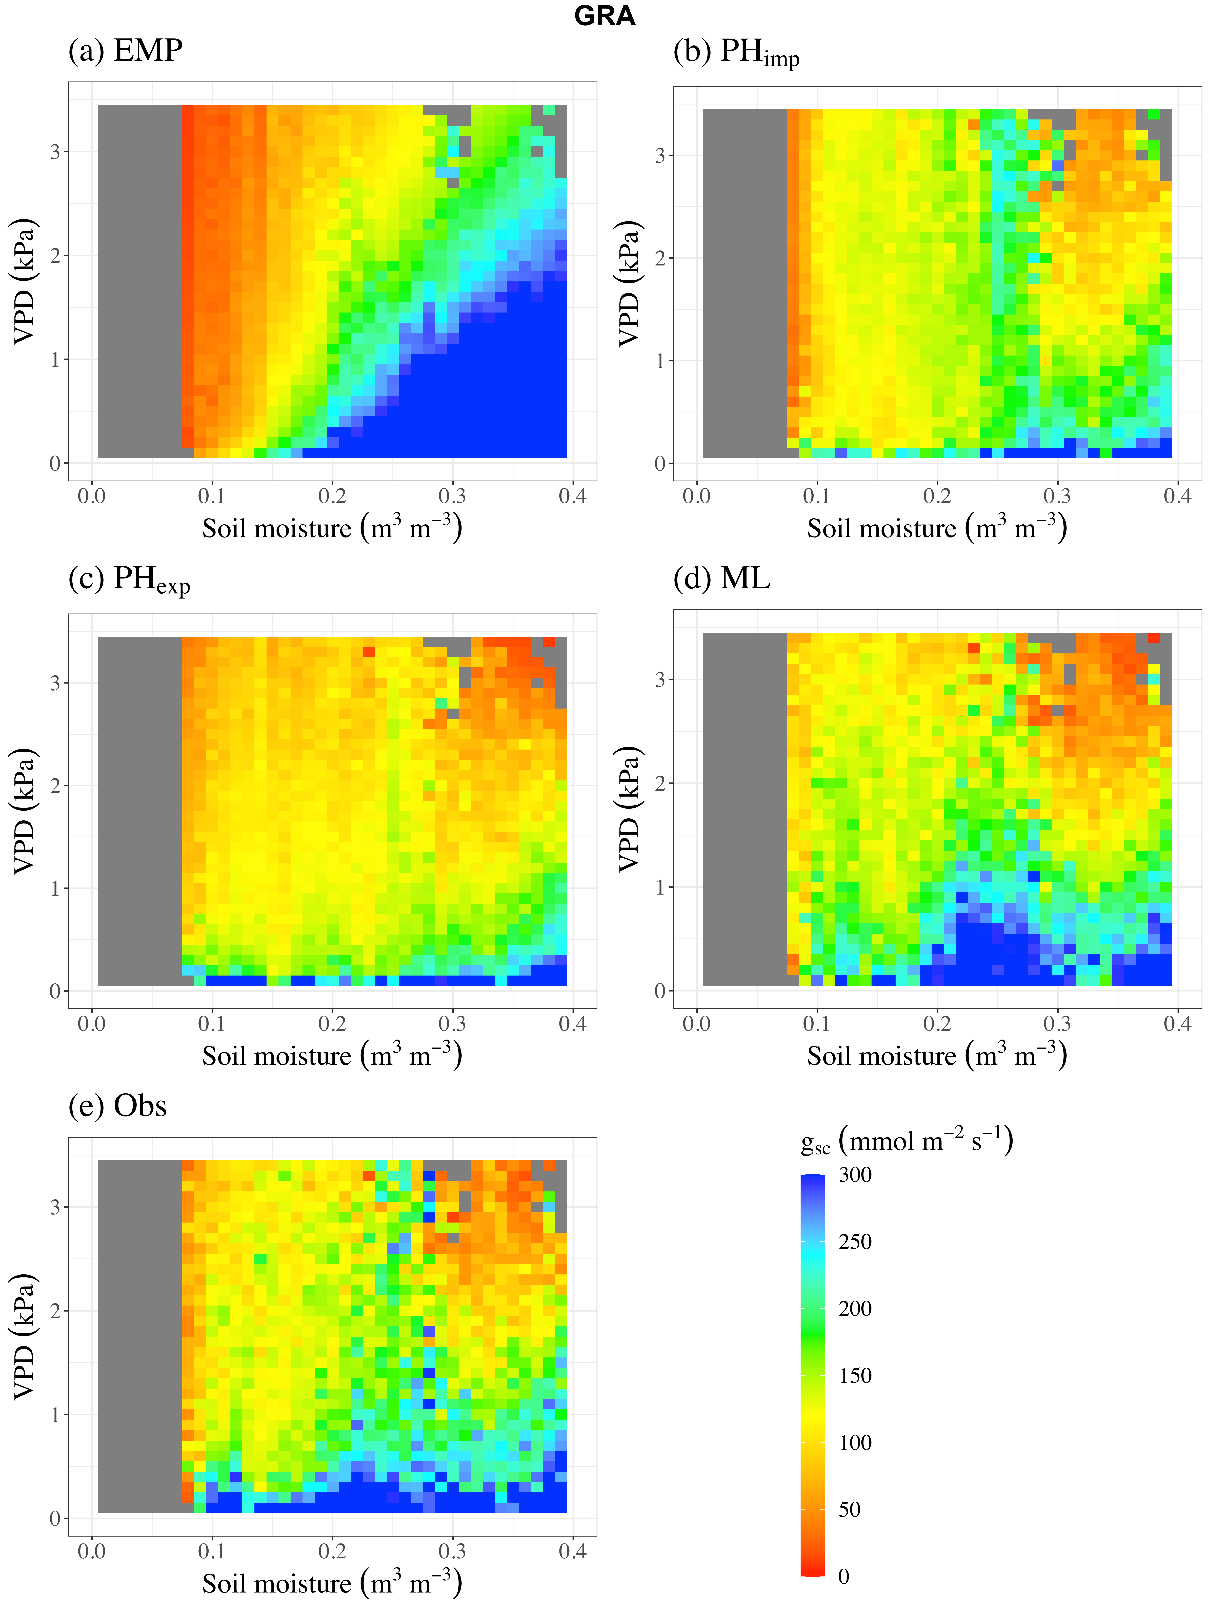 |
| --- |
| Fig. S27. Stomatal conductance () co-regulated by VPD and soil moisture (SM) in Grasslands (GRA) settings. Co-regulation pattern for obtained from (a) empirical model (EMP), (b) implicit representation of plant hydraulics model (PHimp), (c) explicit representation of plant hydraulics model (PHexp), (d) pure machine learning model (ML), and (e) observations. Note that the results here are shown for the case when model calibration is performed against both evapotranspiration (ET) and TEA-obtained plant transpiration (T) (i.e., Configuration-2 with TEA). |

| 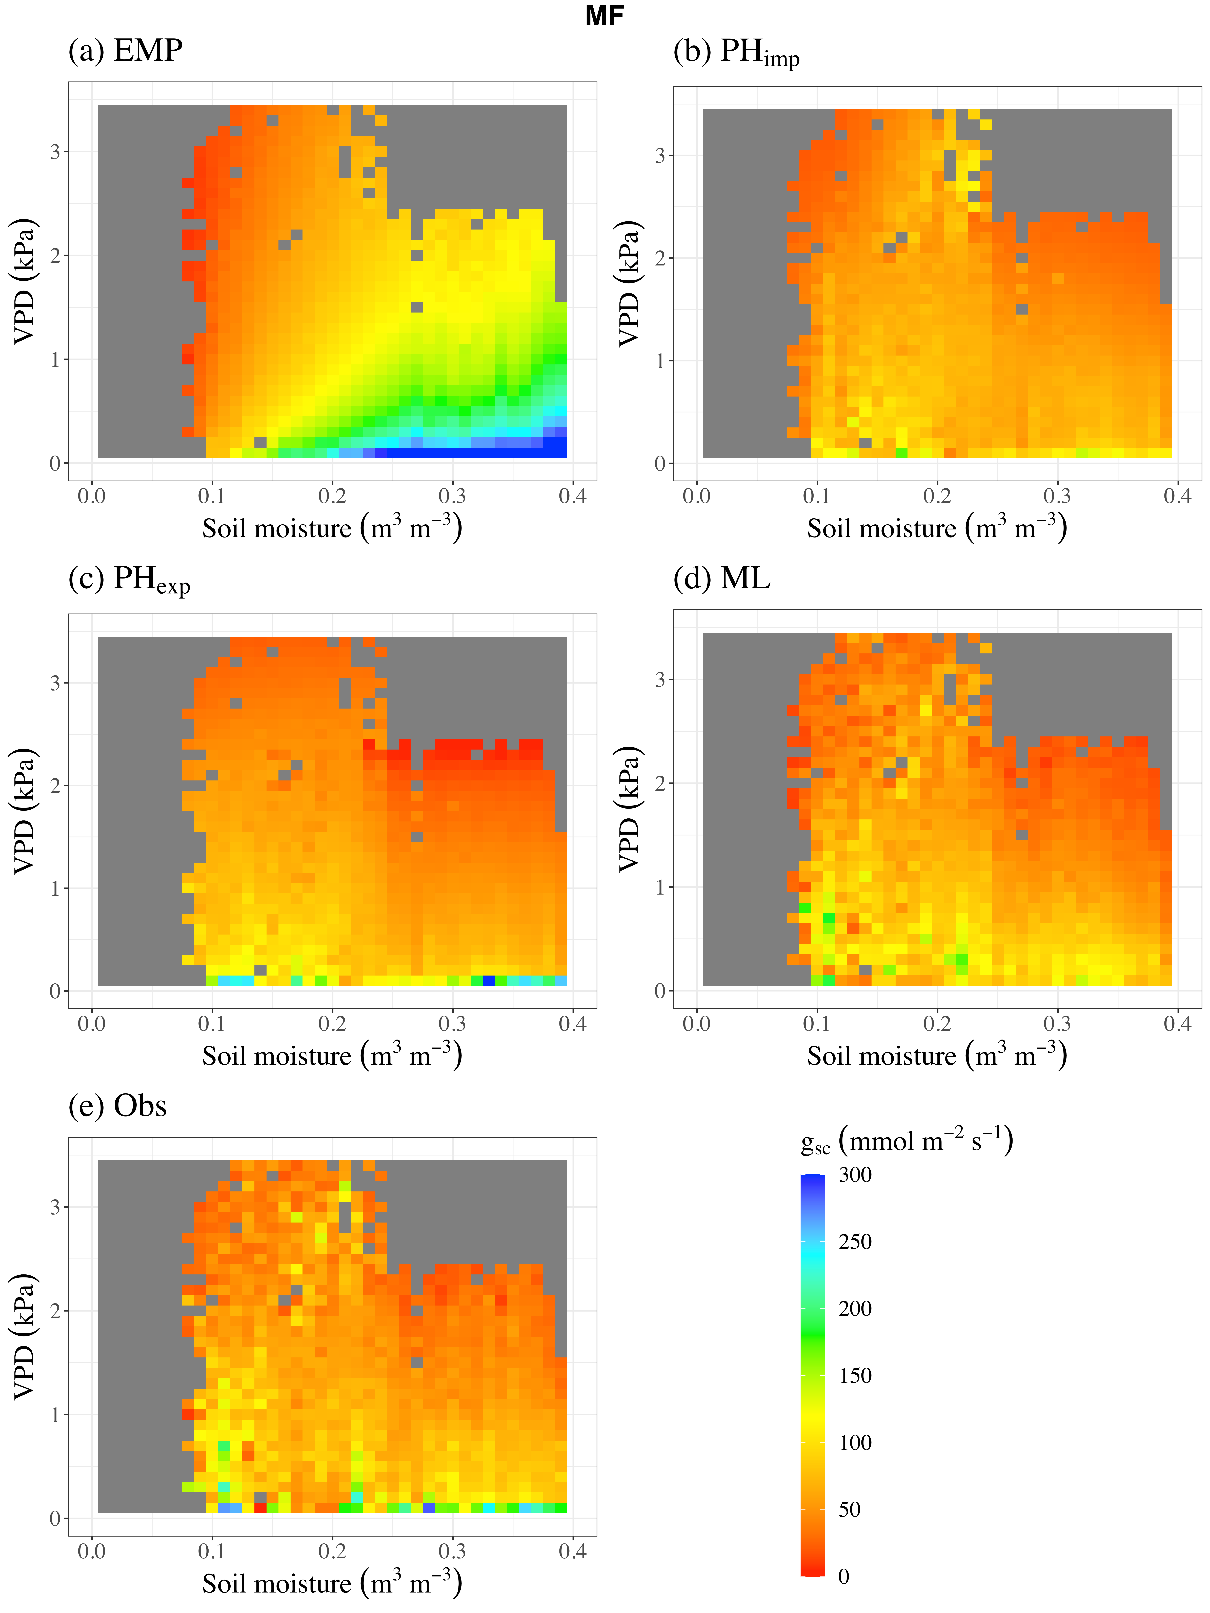 |
| --- |
| Fig. S28. Stomatal conductance () co-regulated by VPD and soil moisture (SM) in Mixed Forests (MF) settings. Co-regulation pattern for obtained from (a) empirical model (EMP), (b) implicit representation of plant hydraulics model (PHimp), (c) explicit representation of plant hydraulics model (PHexp), (d) pure machine learning model (ML), and (e) observations. Note that the results here are shown for the case when model calibration is performed against both evapotranspiration (ET) and TEA-obtained plant transpiration (T) (i.e., Configuration-2 with TEA). |

| 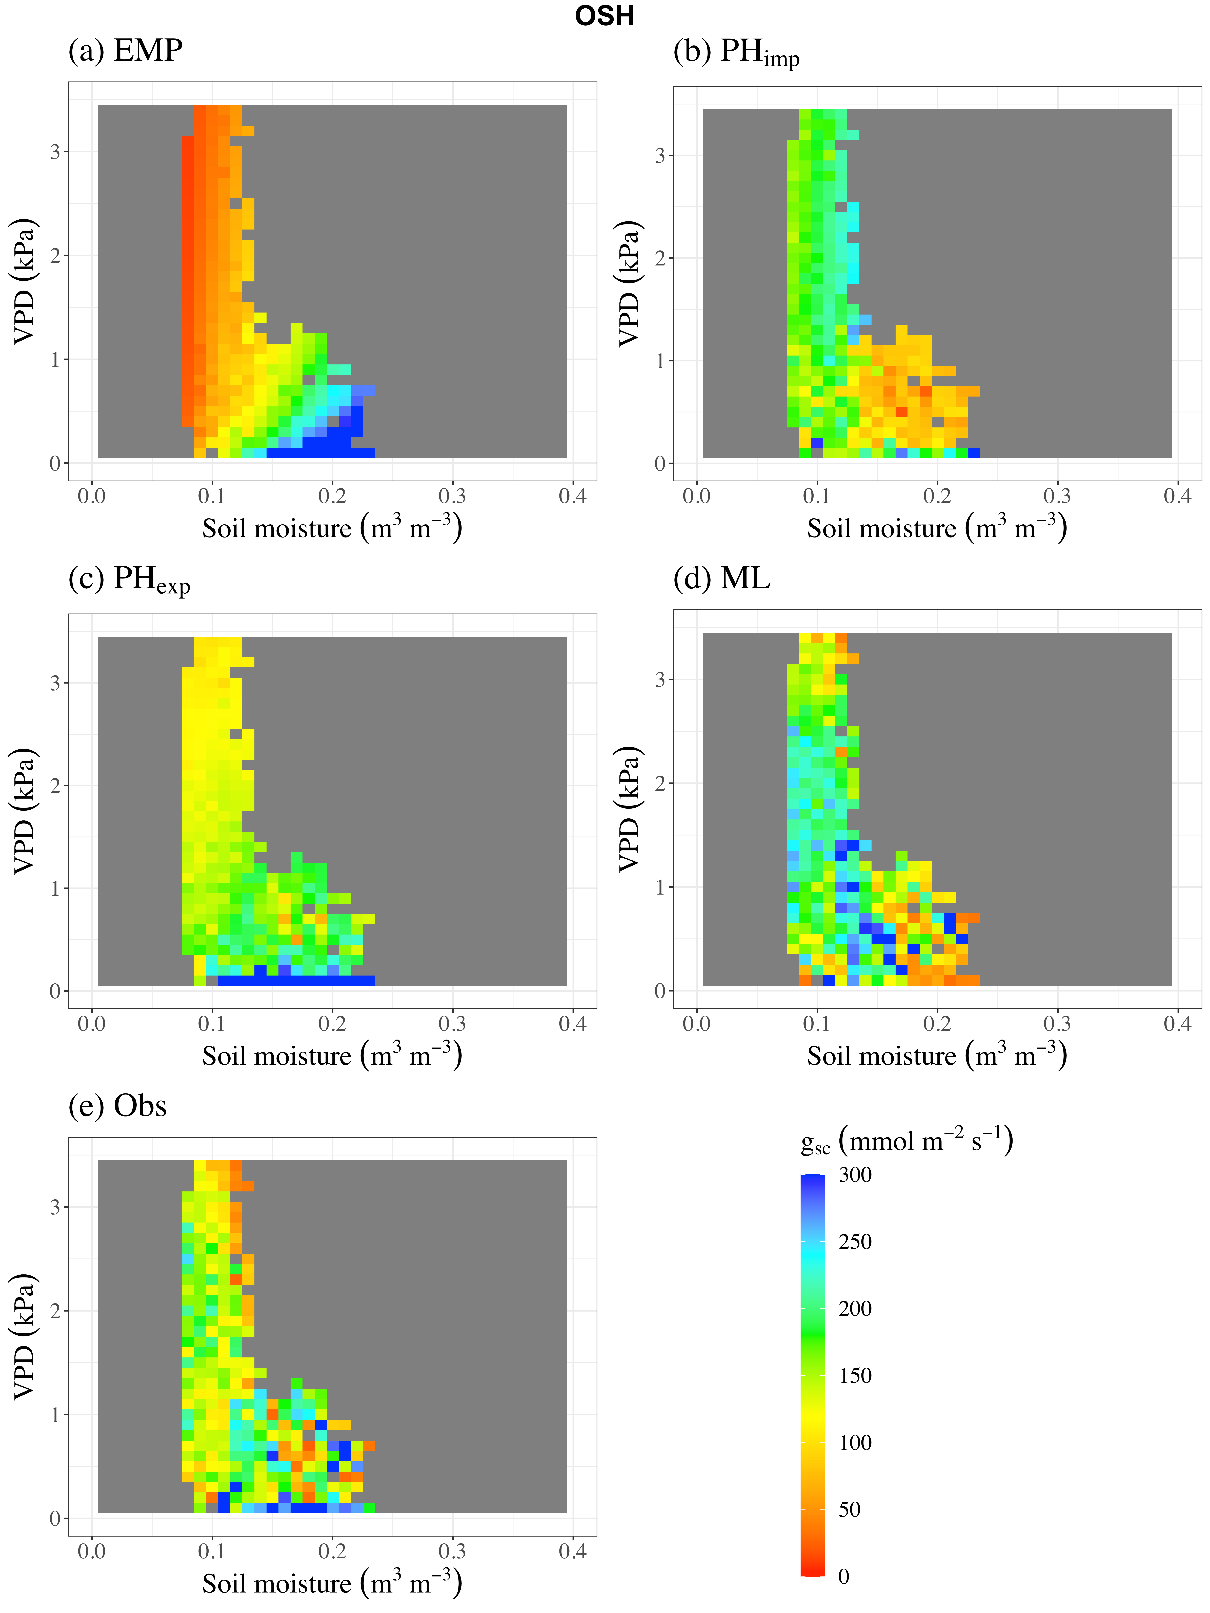 |
| --- |
| Fig. S29. Stomatal conductance () co-regulated by VPD and soil moisture (SM) in Open Shrublands (OSH) settings. Co-regulation pattern for obtained from (a) empirical model (EMP), (b) implicit representation of plant hydraulics model (PHimp), (c) explicit representation of plant hydraulics model (PHexp), (d) pure machine learning model (ML), and (e) observations. Note that the results here are shown for the case when model calibration is performed against both evapotranspiration (ET) and TEA-obtained plant transpiration (T) (i.e., Configuration-2 with TEA). |

| 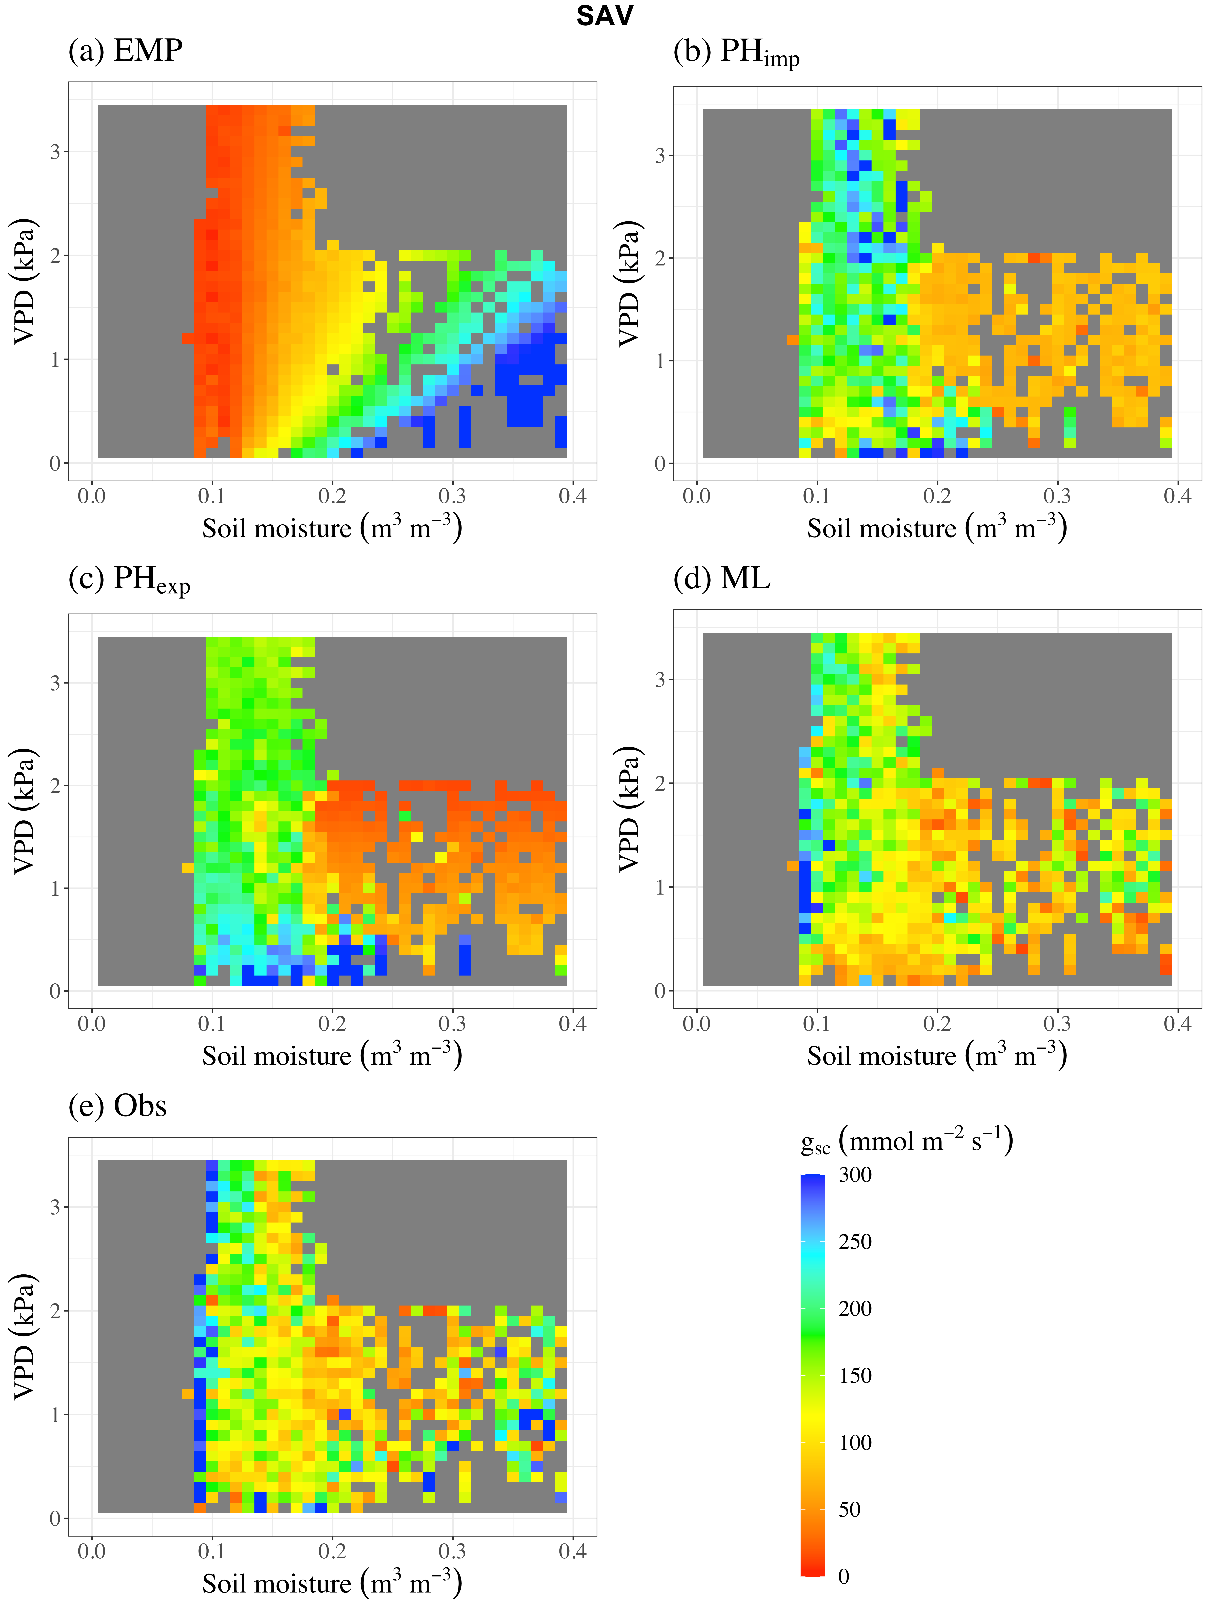 |
| --- |
| Fig. S30. Stomatal conductance () co-regulated by VPD and soil moisture (SM) in Savannas (SAV) settings. Co-regulation pattern for obtained from (a) empirical model (EMP), (b) implicit representation of plant hydraulics model (PHimp), (c) explicit representation of plant hydraulics model (PHexp), (d) pure machine learning model (ML), and (e) observations. Note that the results here are shown for the case when model calibration is performed against both evapotranspiration (ET) and TEA-obtained plant transpiration (T) (i.e., Configuration-2 with TEA). |

| 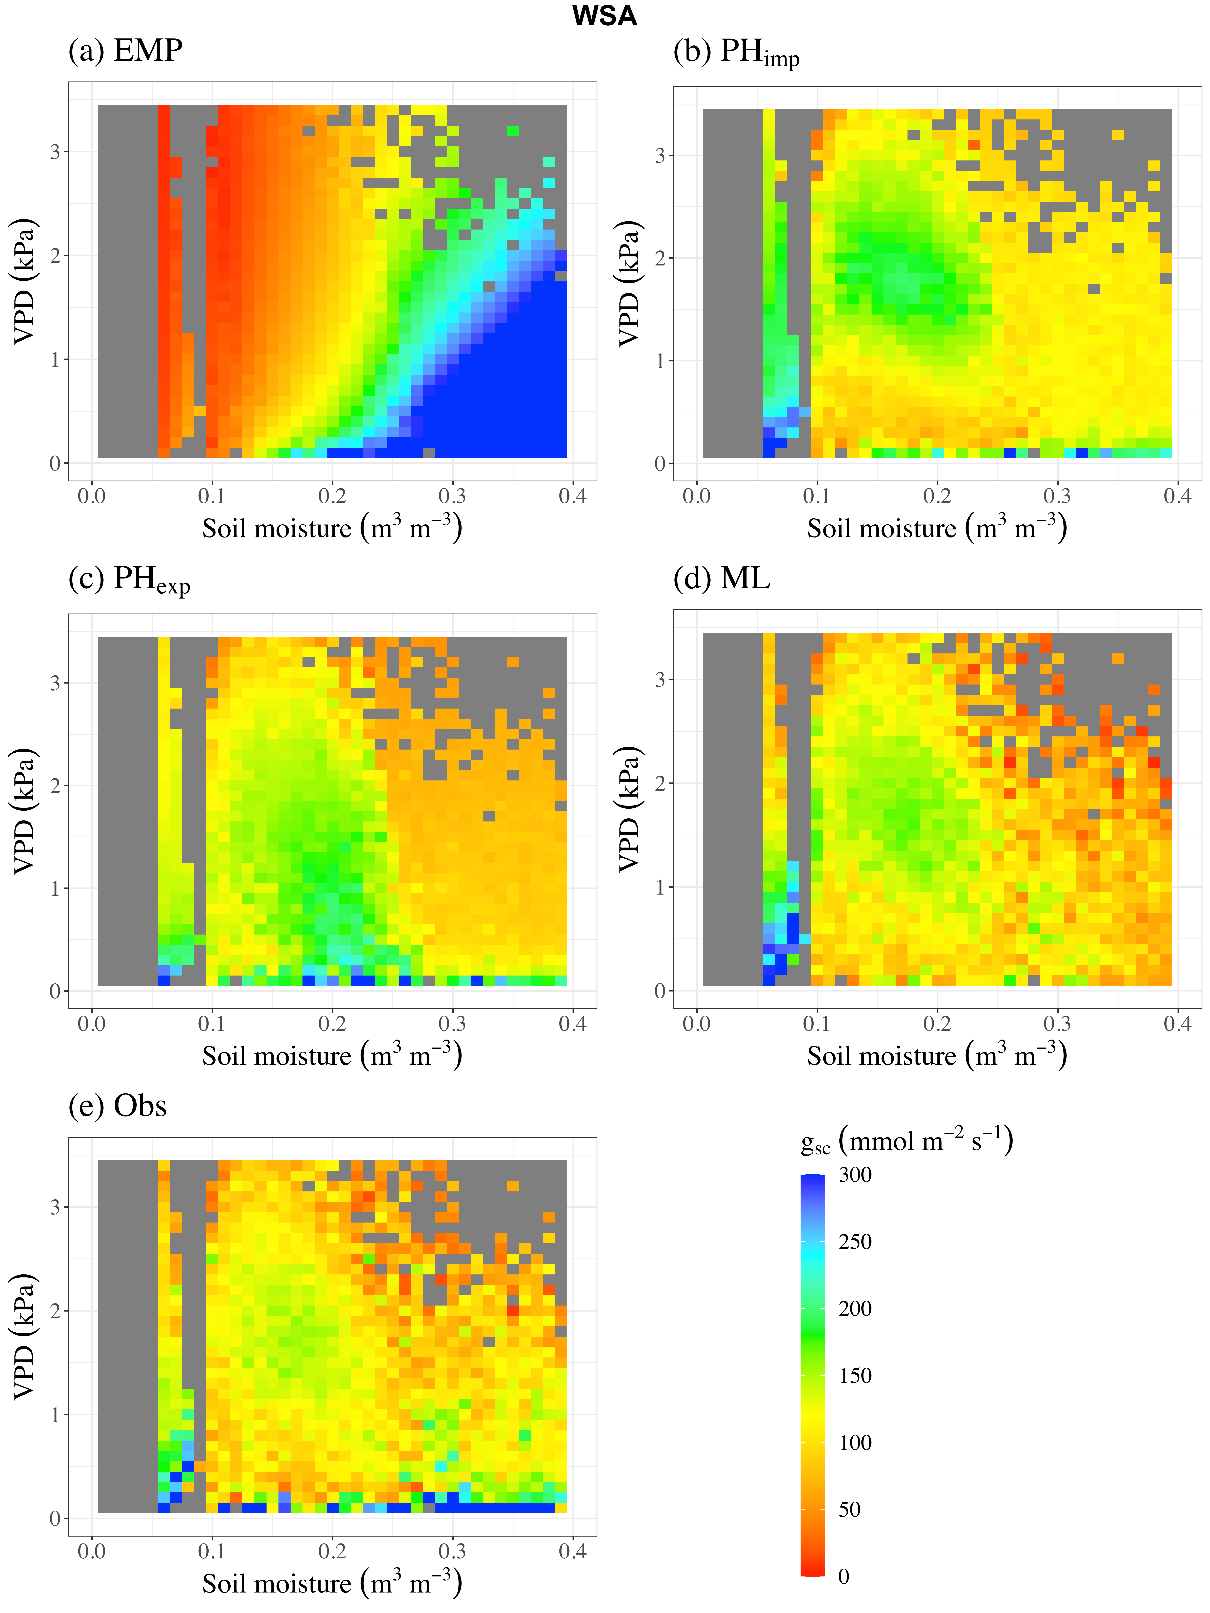 |
| --- |
| Fig. S31. Stomatal conductance () co-regulated by VPD and soil moisture (SM) in Woody Savannas (WSA) settings. Co-regulation pattern for obtained from (a) empirical model (EMP), (b) implicit representation of plant hydraulics model (PHimp), (c) explicit representation of plant hydraulics model (PHexp), (d) pure machine learning model (ML), and (e) observations. Note that the results here are shown for the case when model calibration is performed against both evapotranspiration (ET) and TEA-obtained plant transpiration (T) (i.e., Configuration-2 with TEA). |

| 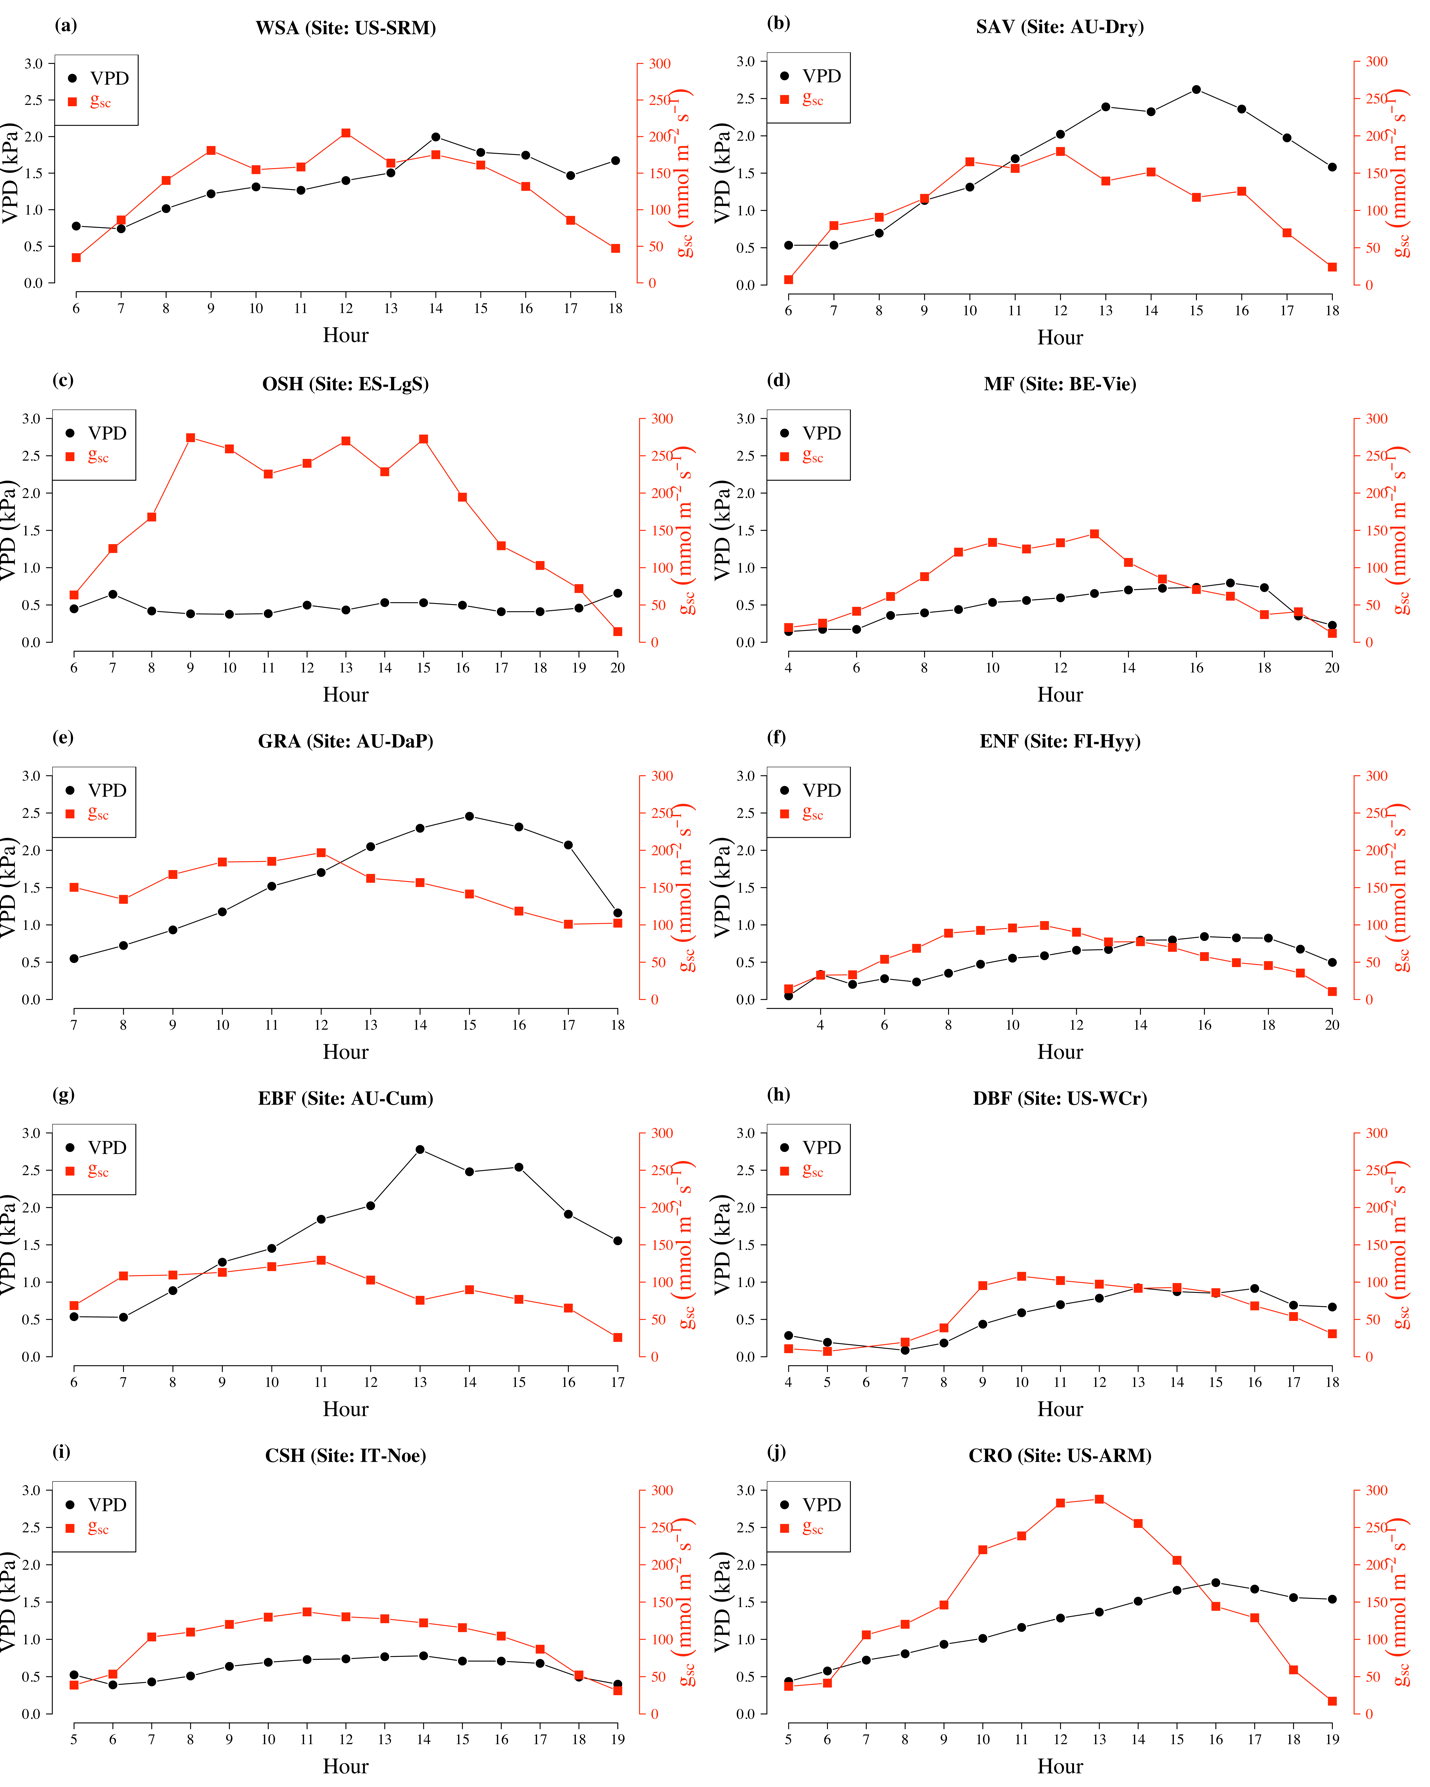 |
| --- |
| Fig. S32. Diurnal variation of stomatal conductance () and vapor pressure deficit (VPD) across different biomes. Data in these plots are the mean diurnal values of and VPD for the month of April in a given year at a site in particular biome. This illustrates the hysteresis between and VPD. |

| 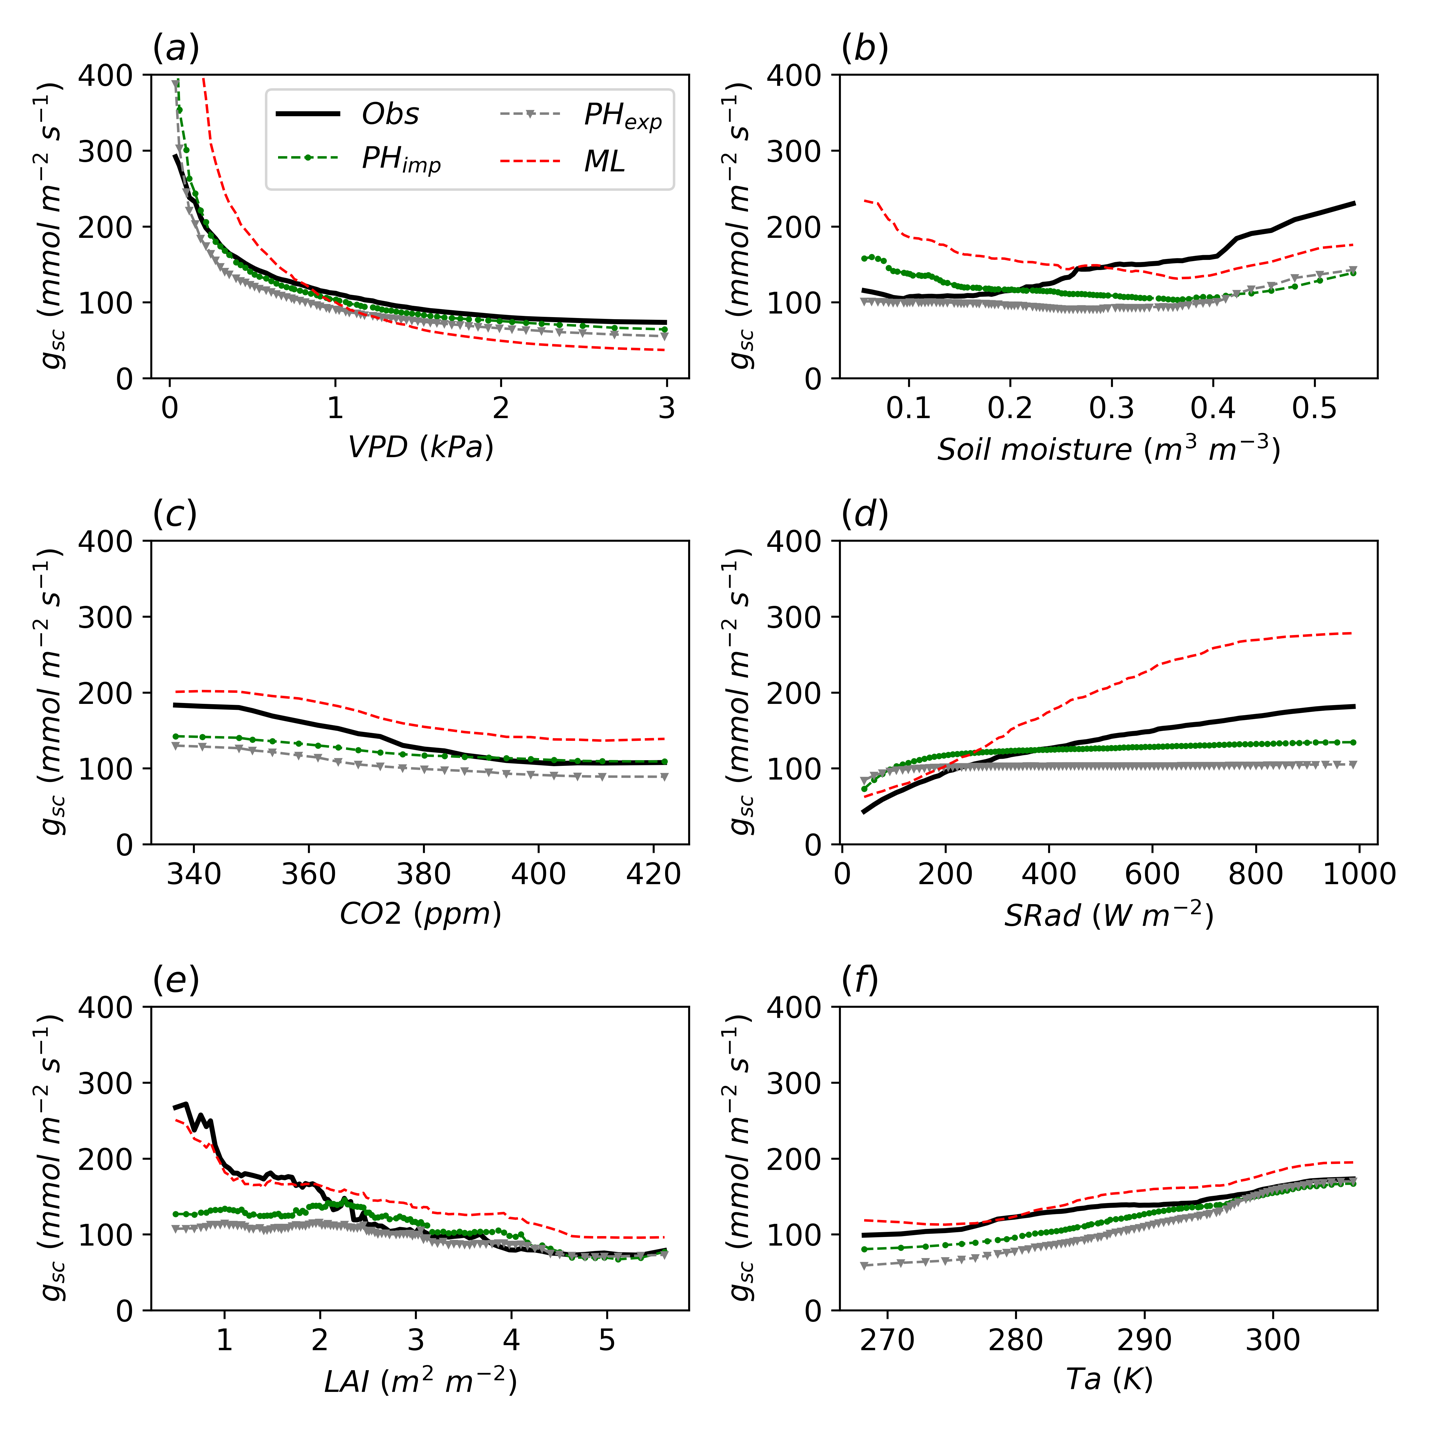 |
| --- |
| Fig. S33. Partial dependance plots: Stomatal conductance (𝑔𝑠𝑐) as a function of different variables including vapor pressure deficit (VPD), soil moisture (SM), atmospheric concentration (), solar radiation (SRad), leaf area index (LAI), and air temperature () in the observations and different models for Configuration-1.   | 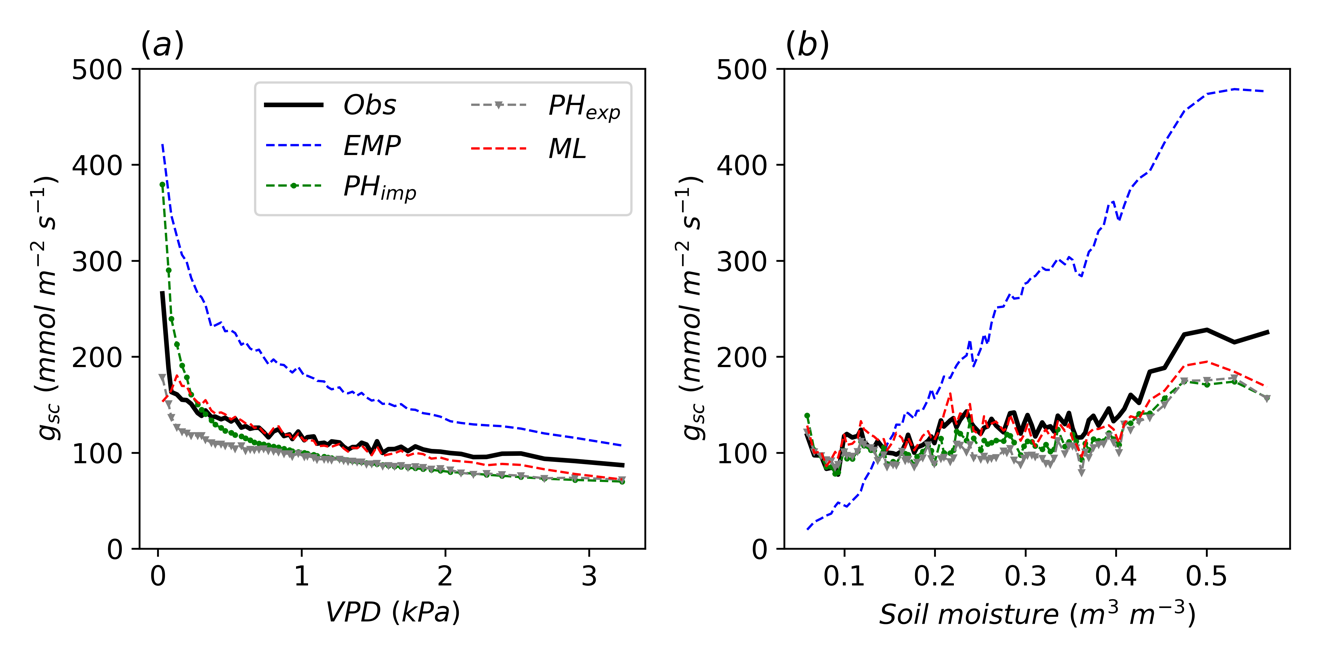 | | --- | | Fig. S34. Partial dependance plots: Stomatal conductance (𝑔𝑠𝑐) as a function of vapor pressure deficit (VPD) and soil moisture (SM) in the observations and different models for Configuration-2. | |

| 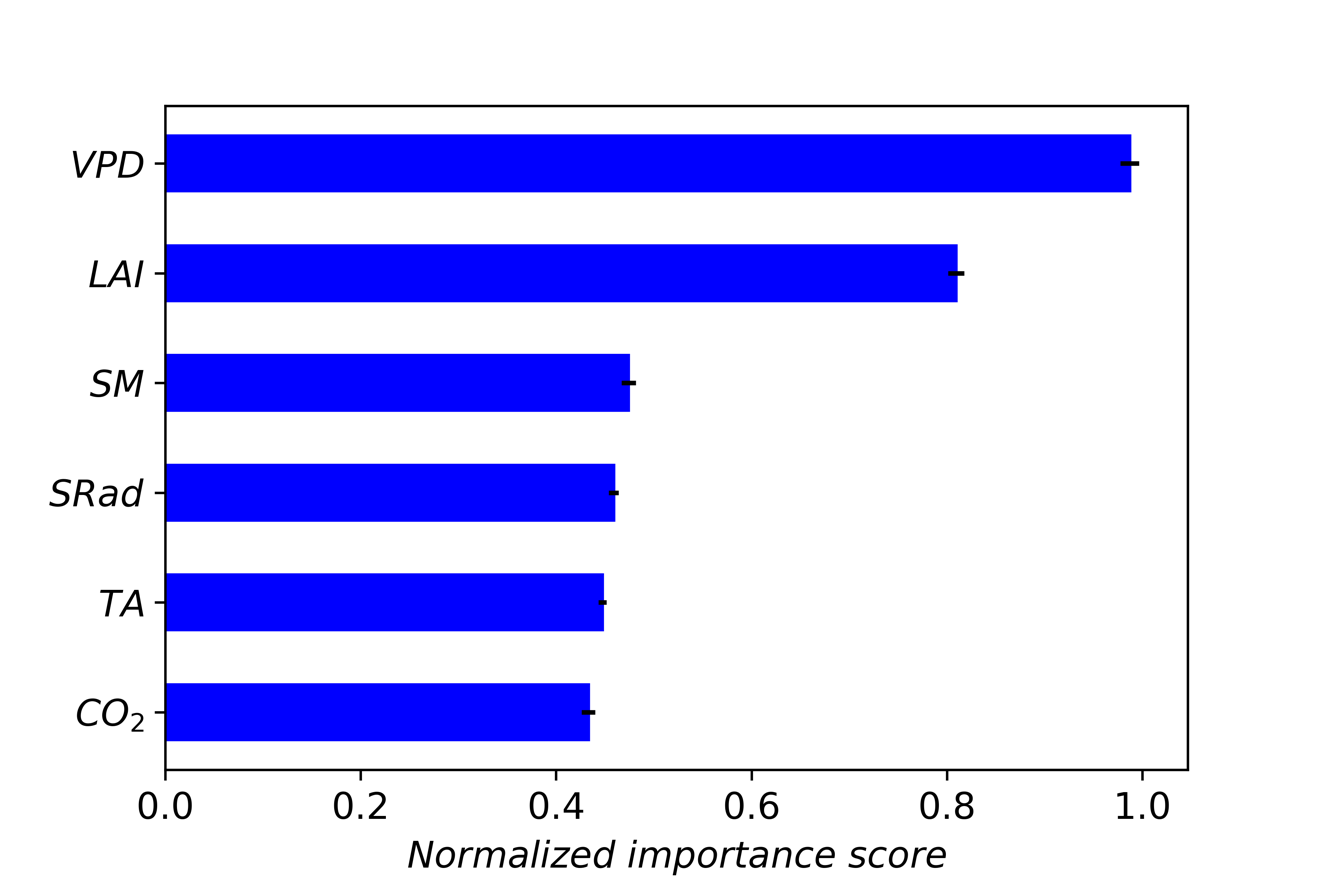 |
| --- |
| Fig. S35. Normalized variable importance for predicting observed . Variable importance of a variable is calculated based on the increase in prediction error when the concerned variable is randomly shuffled within the random forest regressor. Variable importance is calculated for n = 100 random reshuffles. The error bars represent the 95% confidence interval for the importance score. Considered variables include vapor pressure deficit (VPD), soil moisture (SM), solar radiation (SRad), atmospheric concentration (), leaf area index (LAI), and air temperature (). Data from all the sites are used. |

**References for Supporting Information**

1 Ukkola, A. M., Abramowitz, G. & De Kauwe, M. G. A flux tower dataset tailored for land model evaluation. *Earth System Science Data* **14**, 449-461 (2022).
